# Supplementary material for: Comparative Analysis of Cotton Small RNAs and Their Target Genes in Response to Salt Stress
Source: MDPI journal article supplement (doi:10.3390/genes8120369), 2017-12-05

Ghr-miR1327

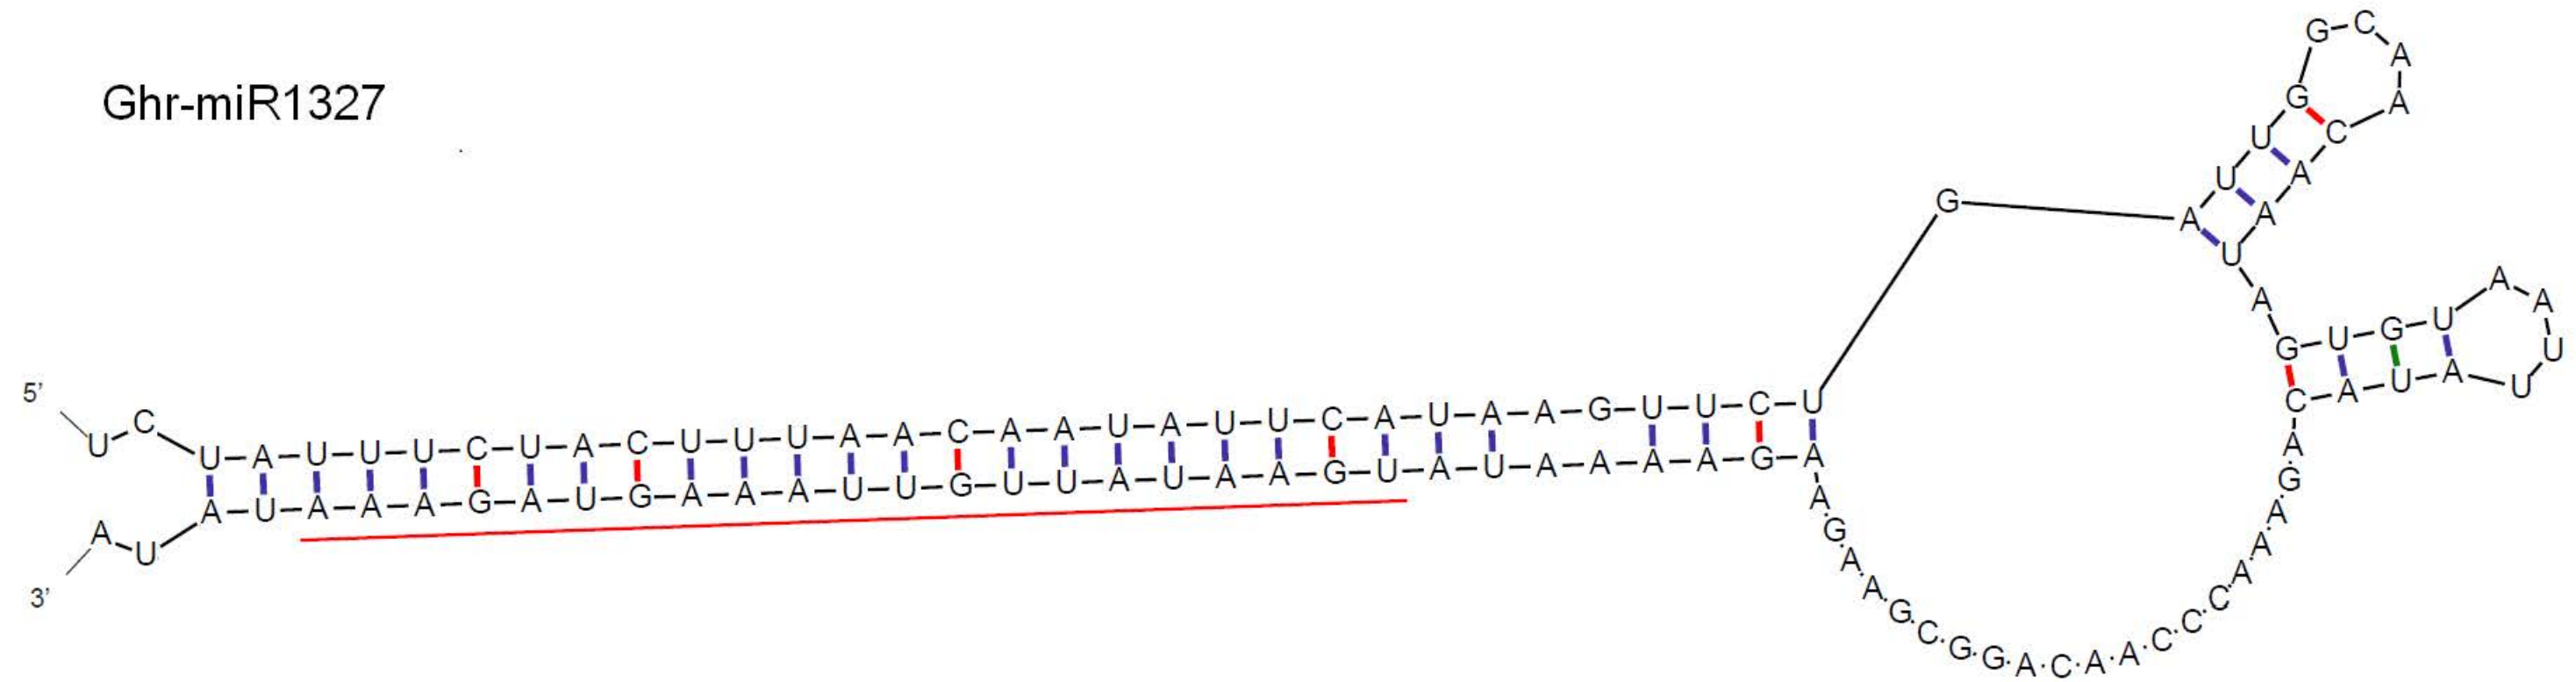

Ghr-miR1335

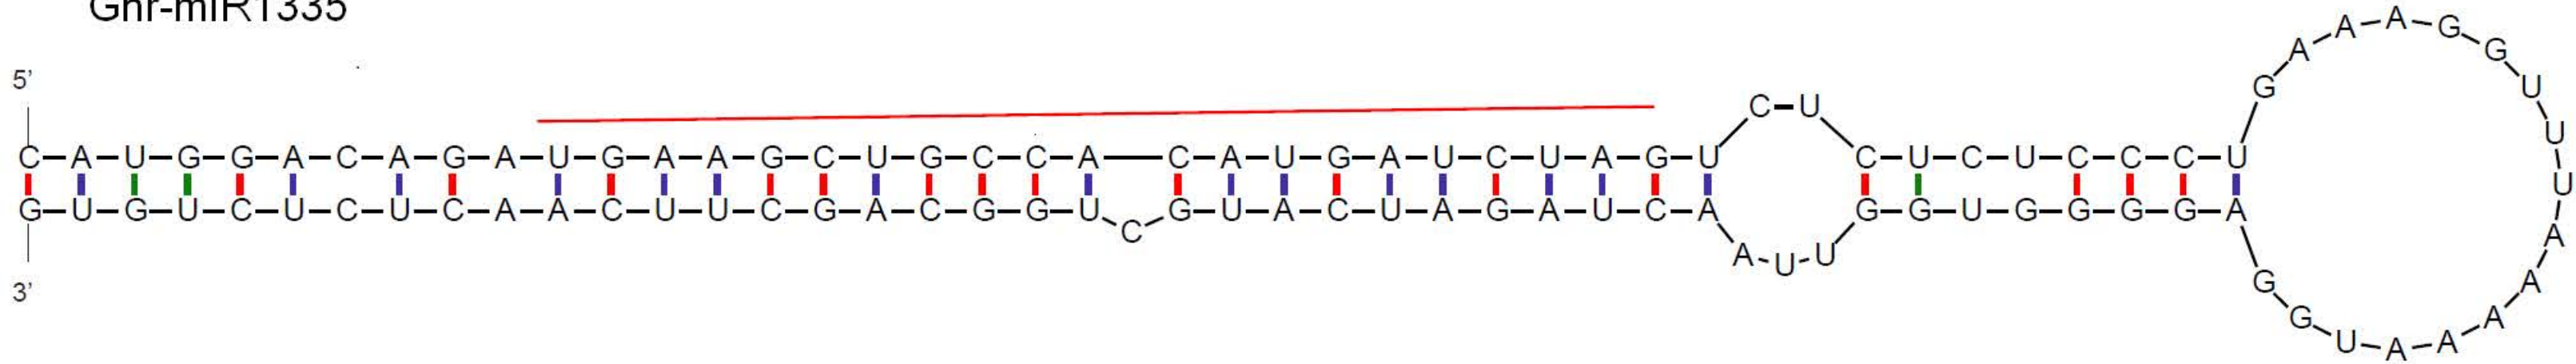





# Ghr-miR1338

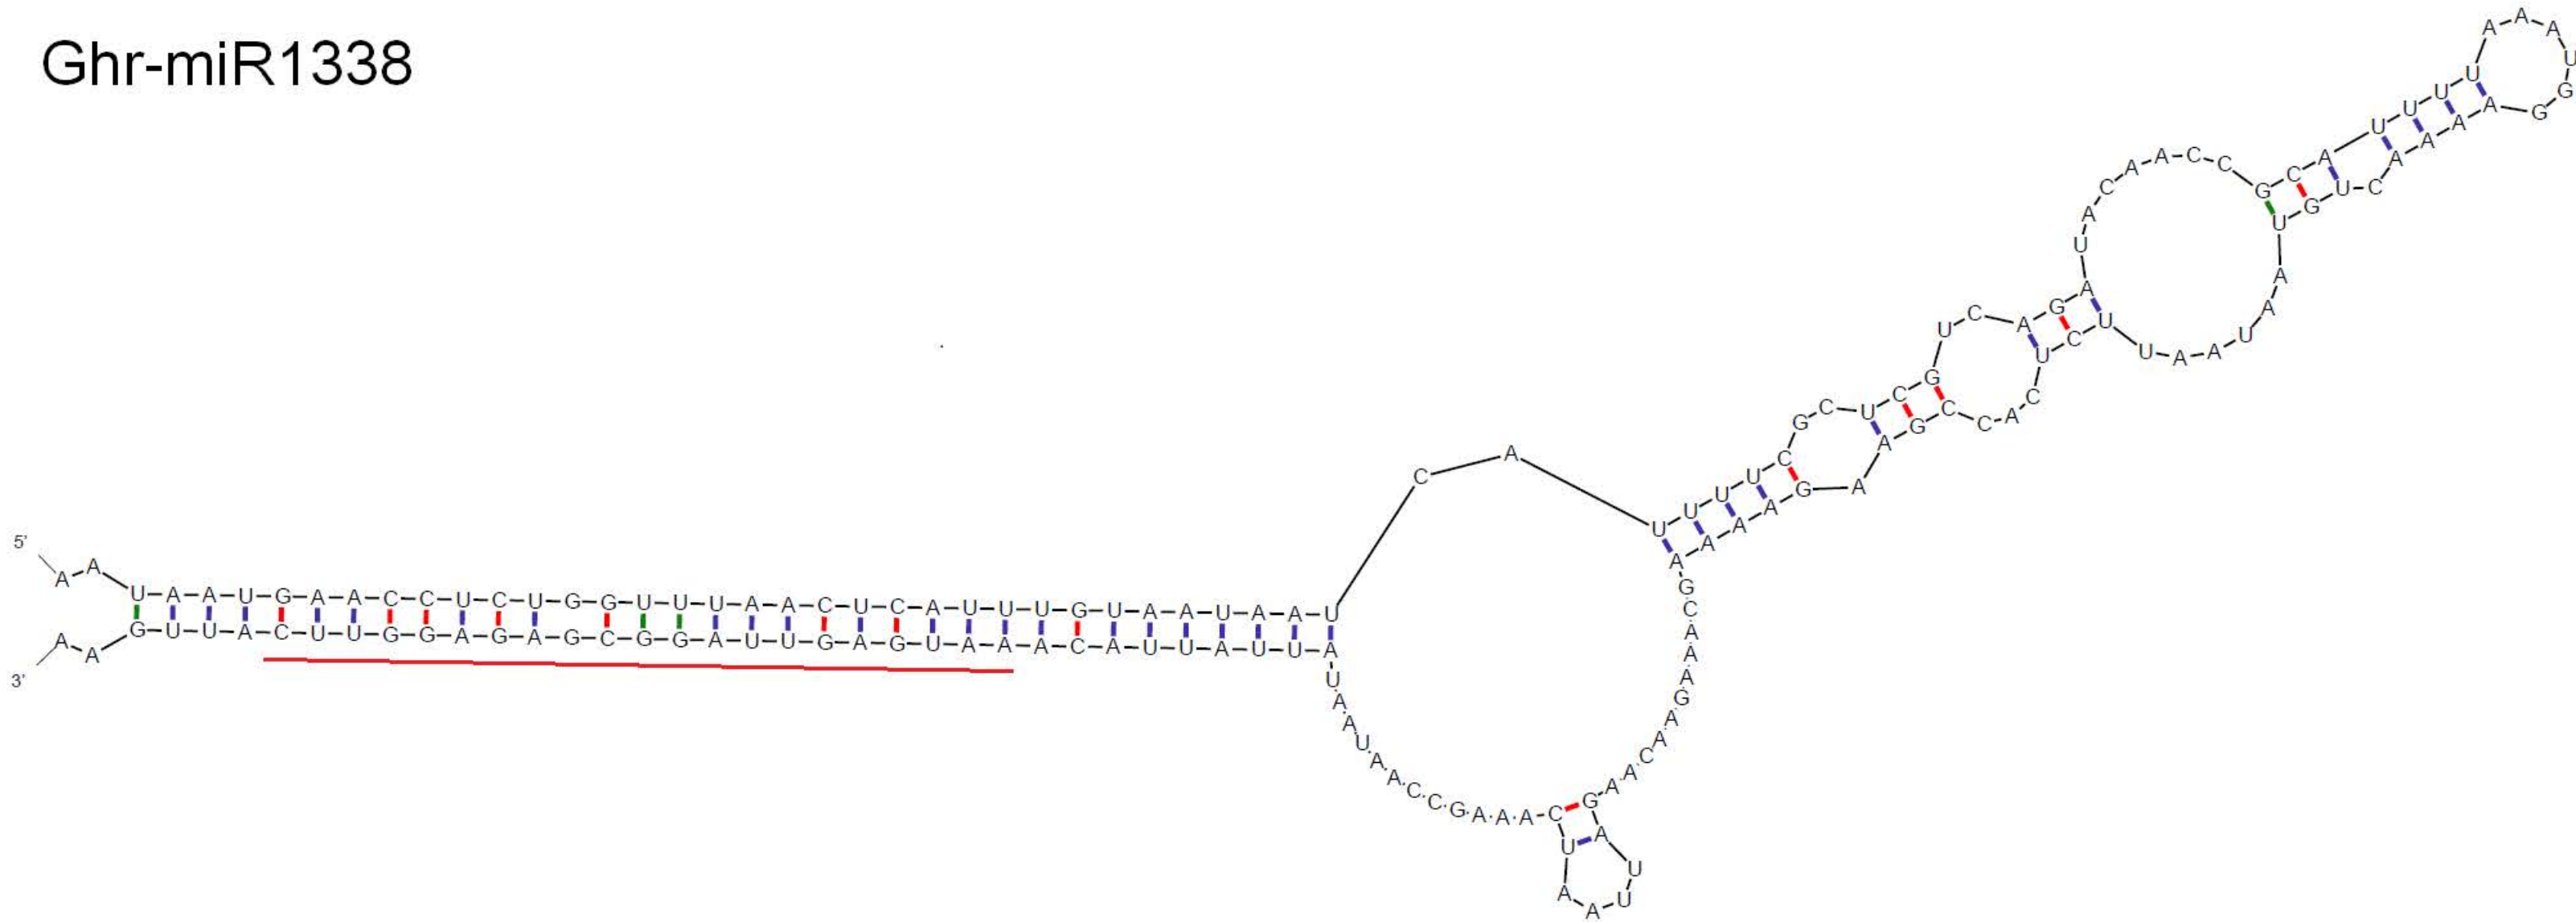



## Ghr-miR1340

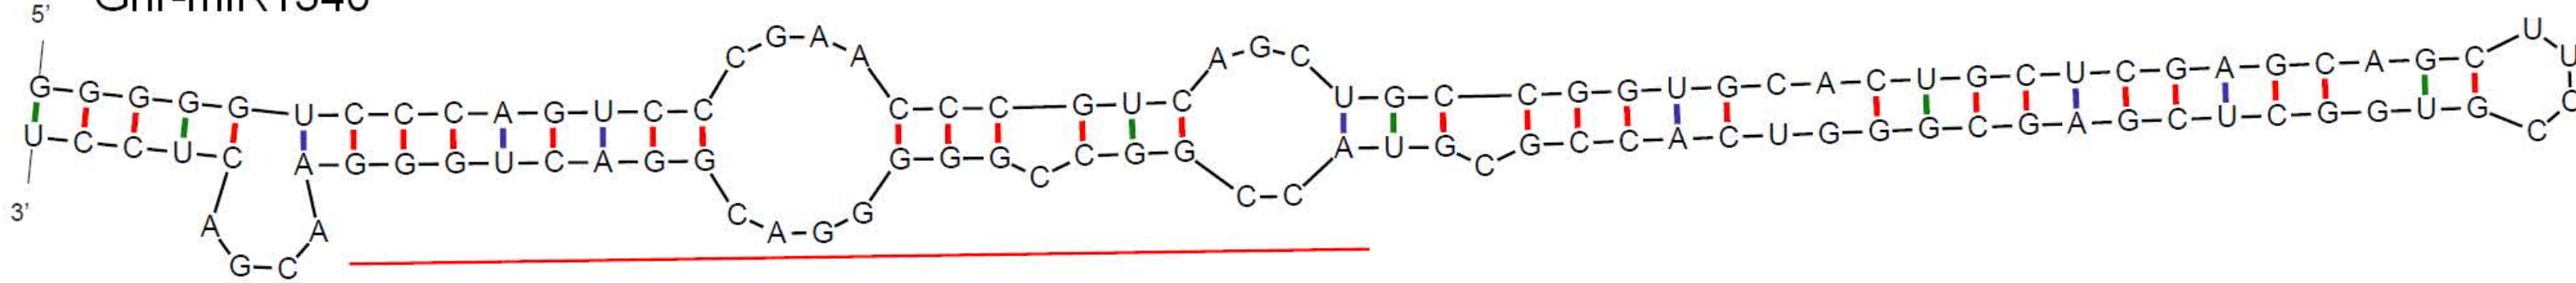





Ghr-miR1342

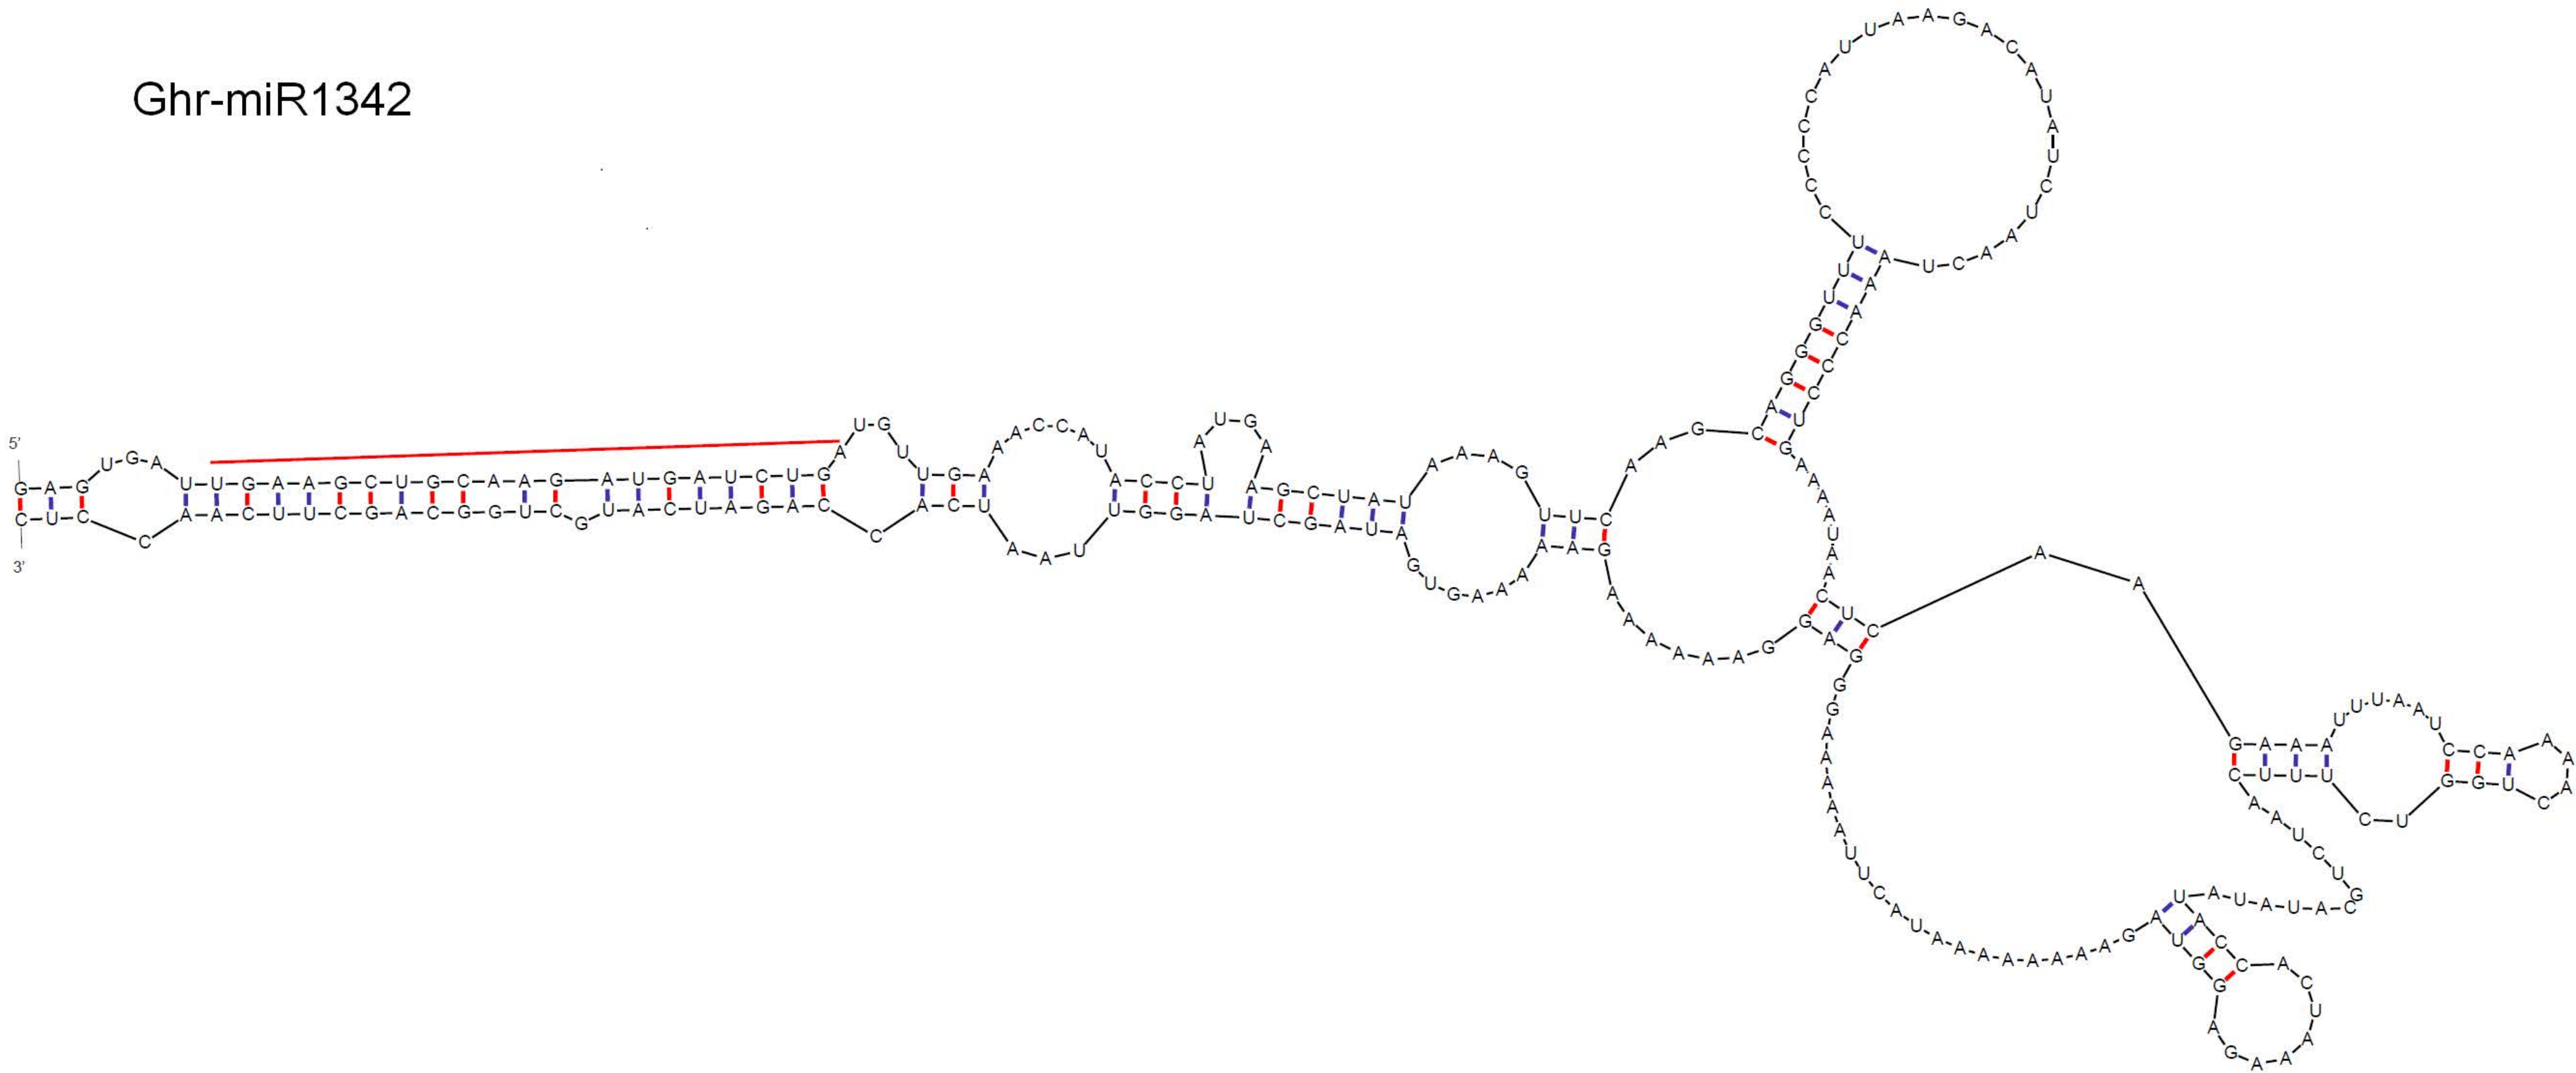

# Ghr-miR1343

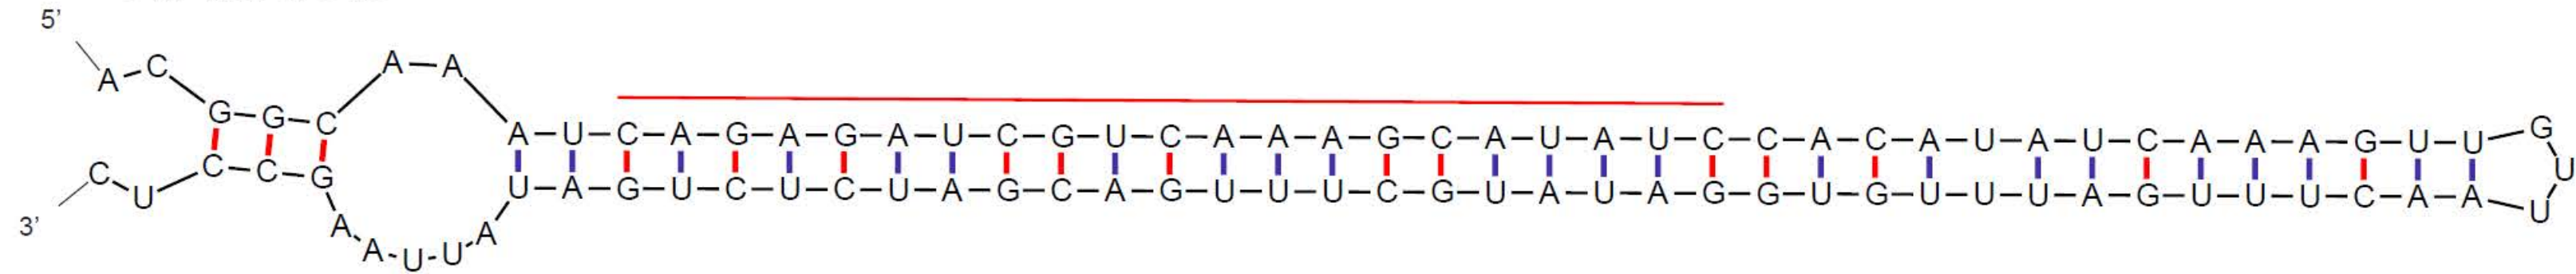

# Ghr-miR1344

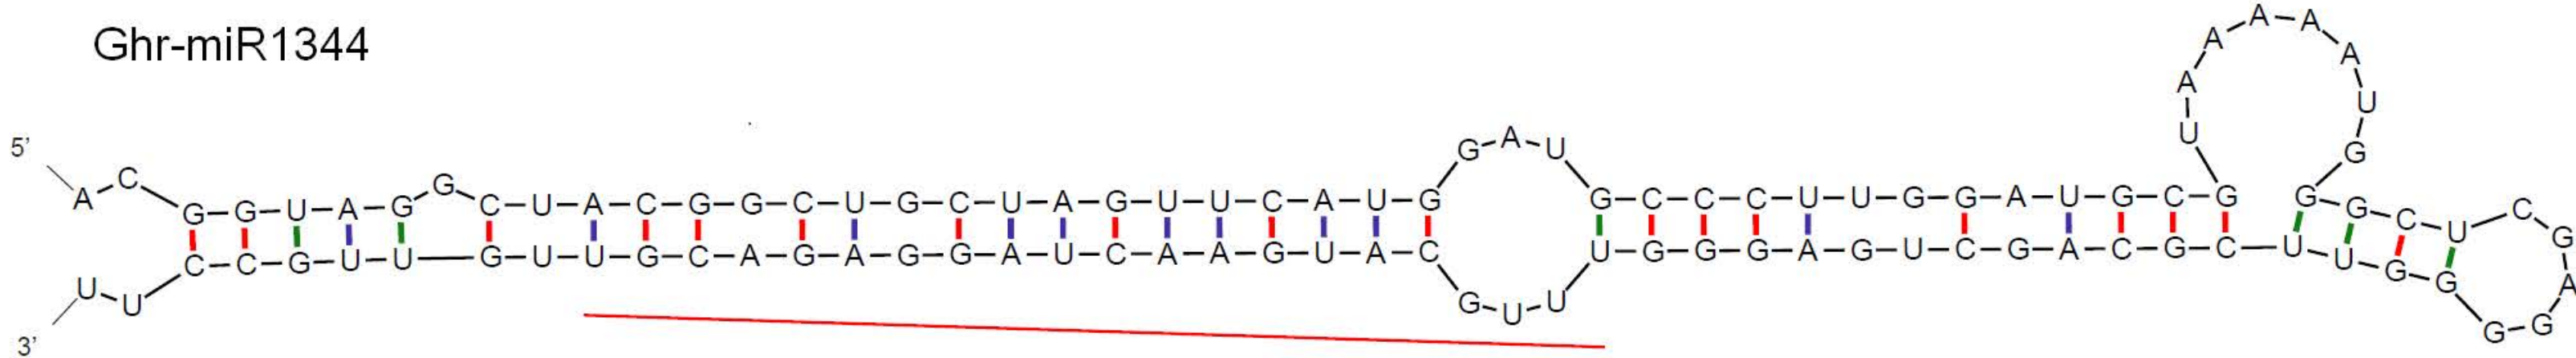

# Ghr-miR1345

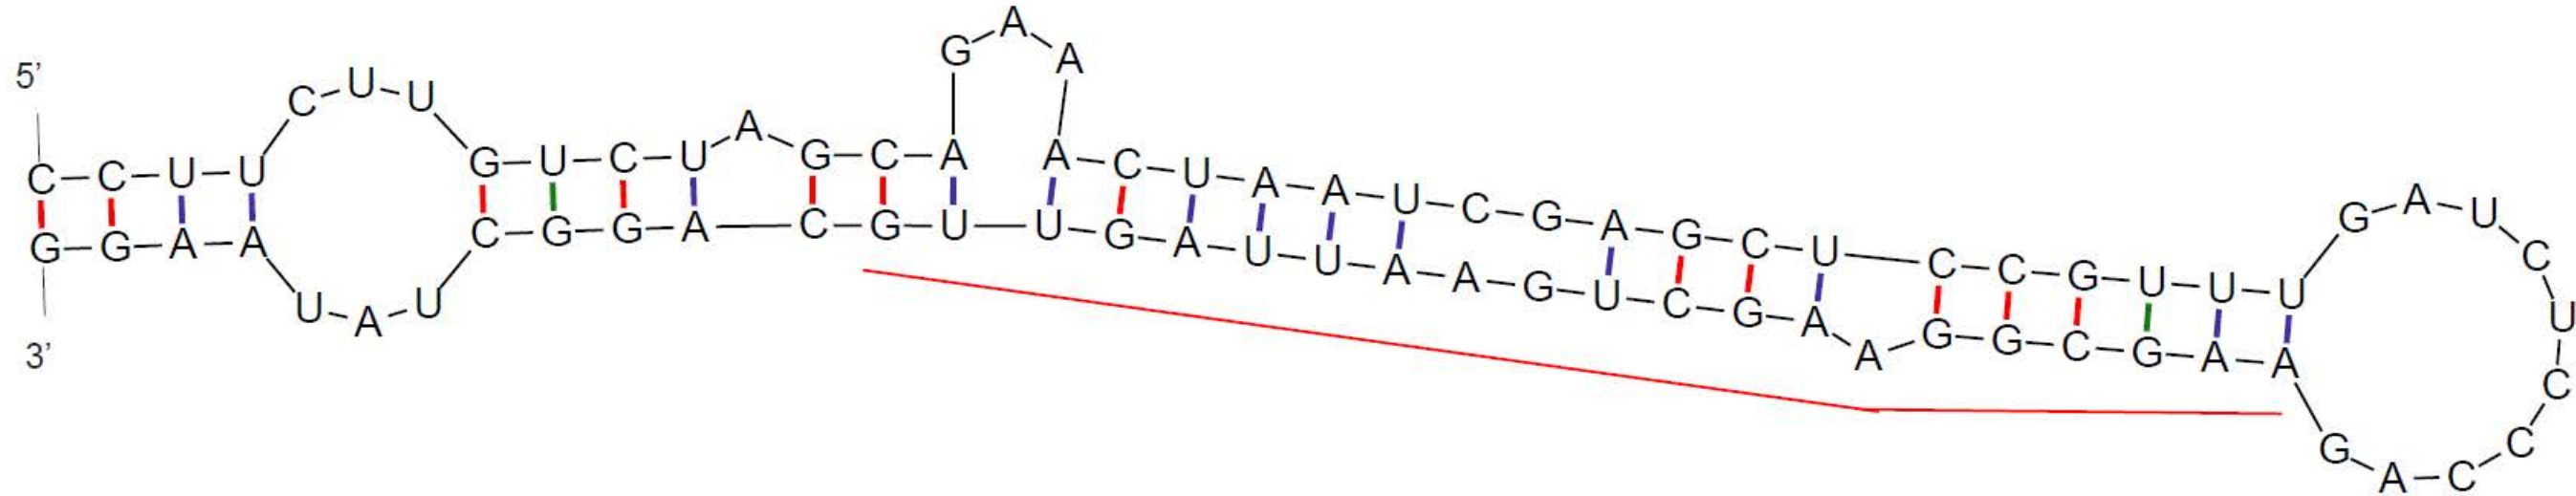

Ghr-miR1346

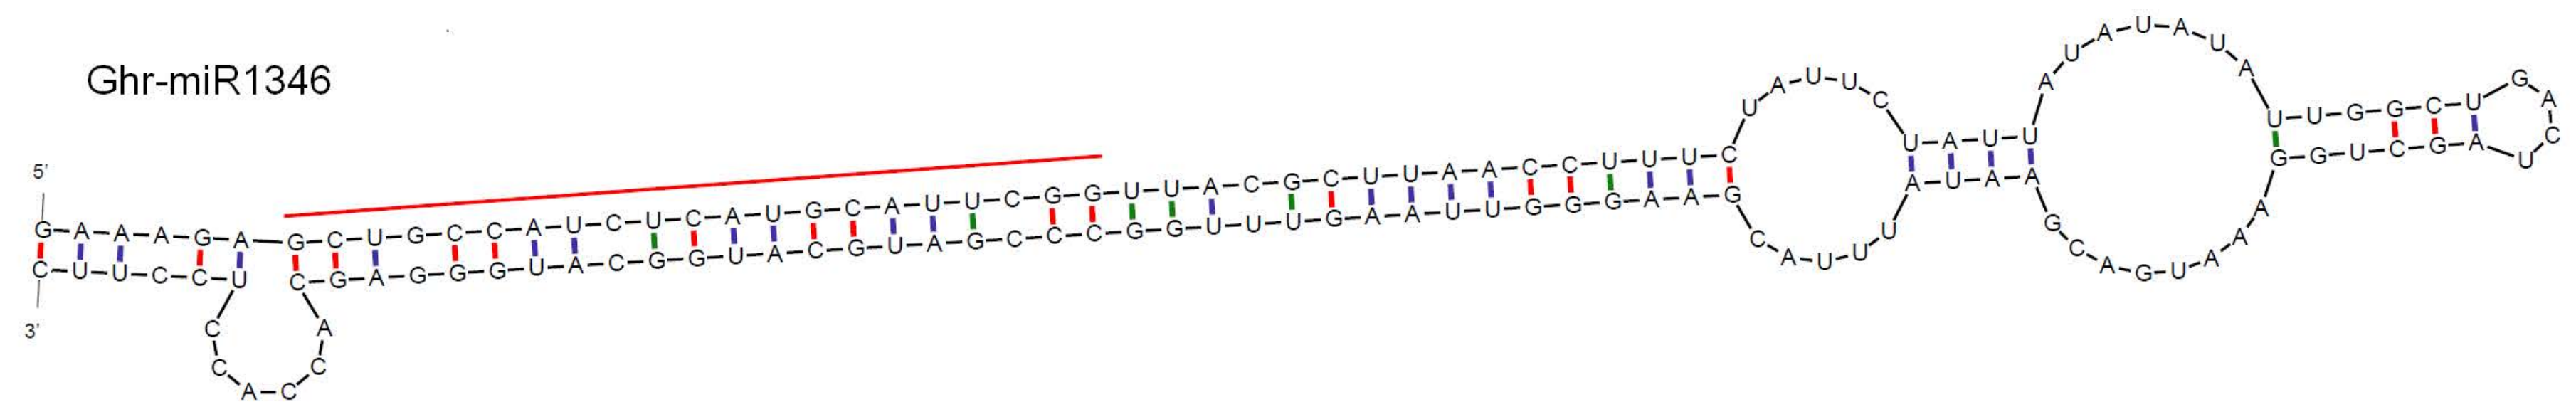



# Ghr-miR1348

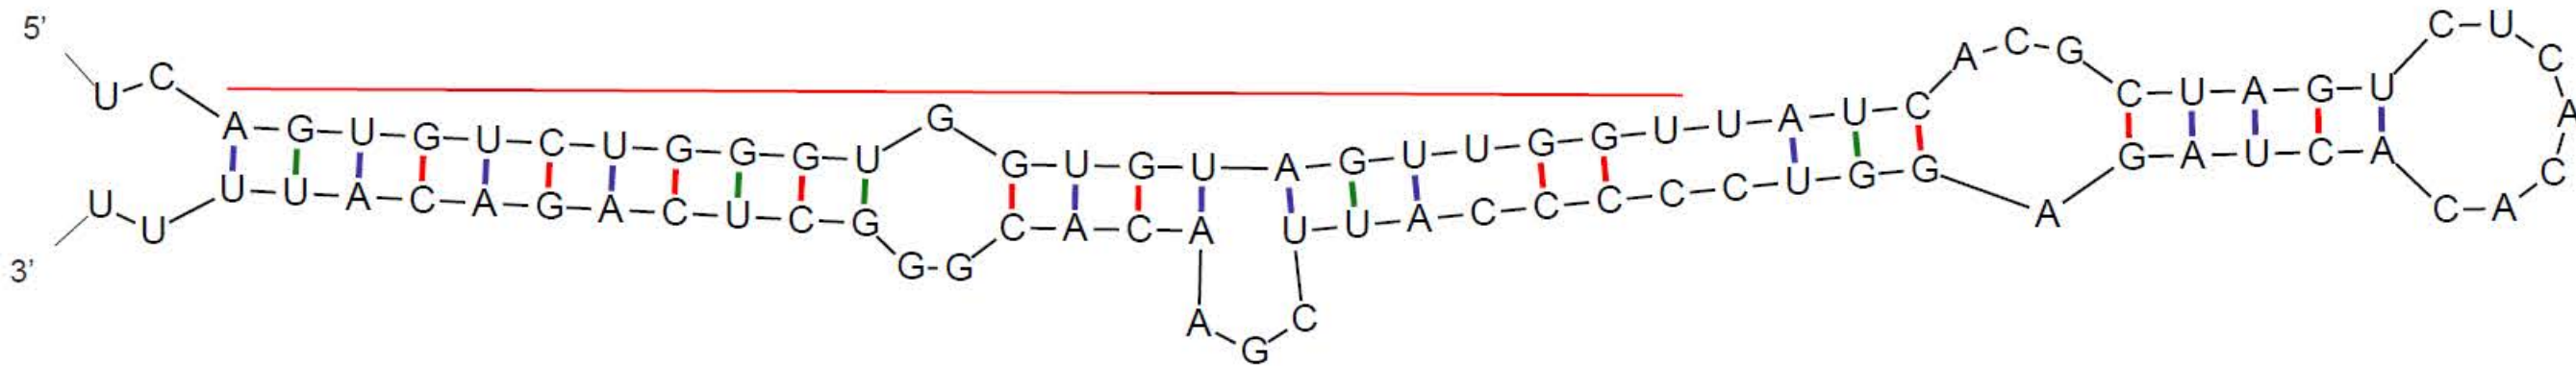

## Ghr-miR1349

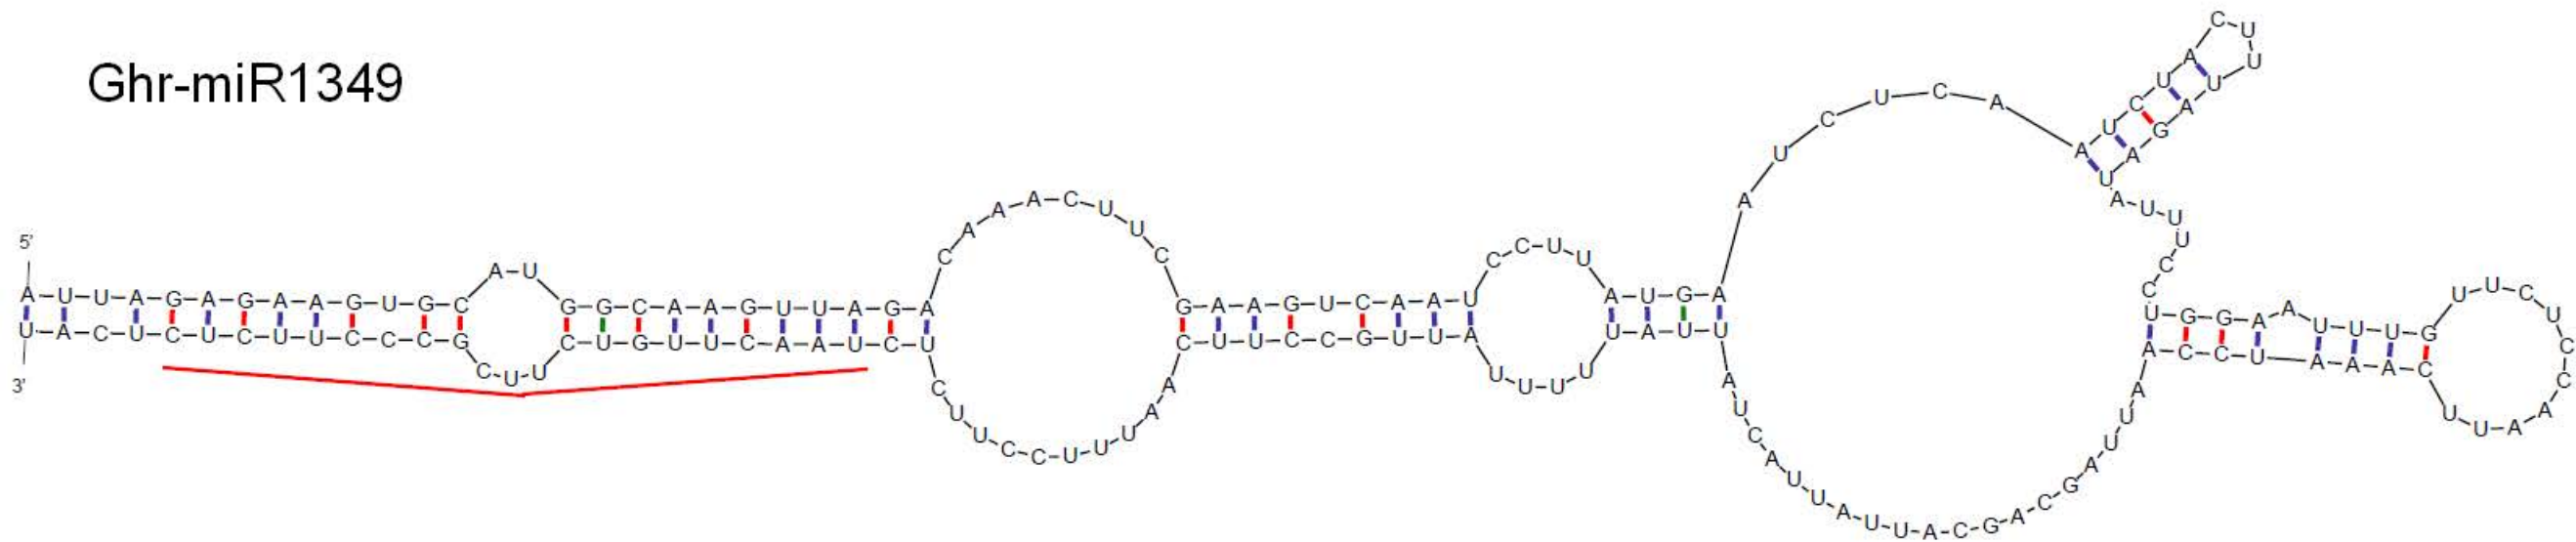



## Ghr-miR1350

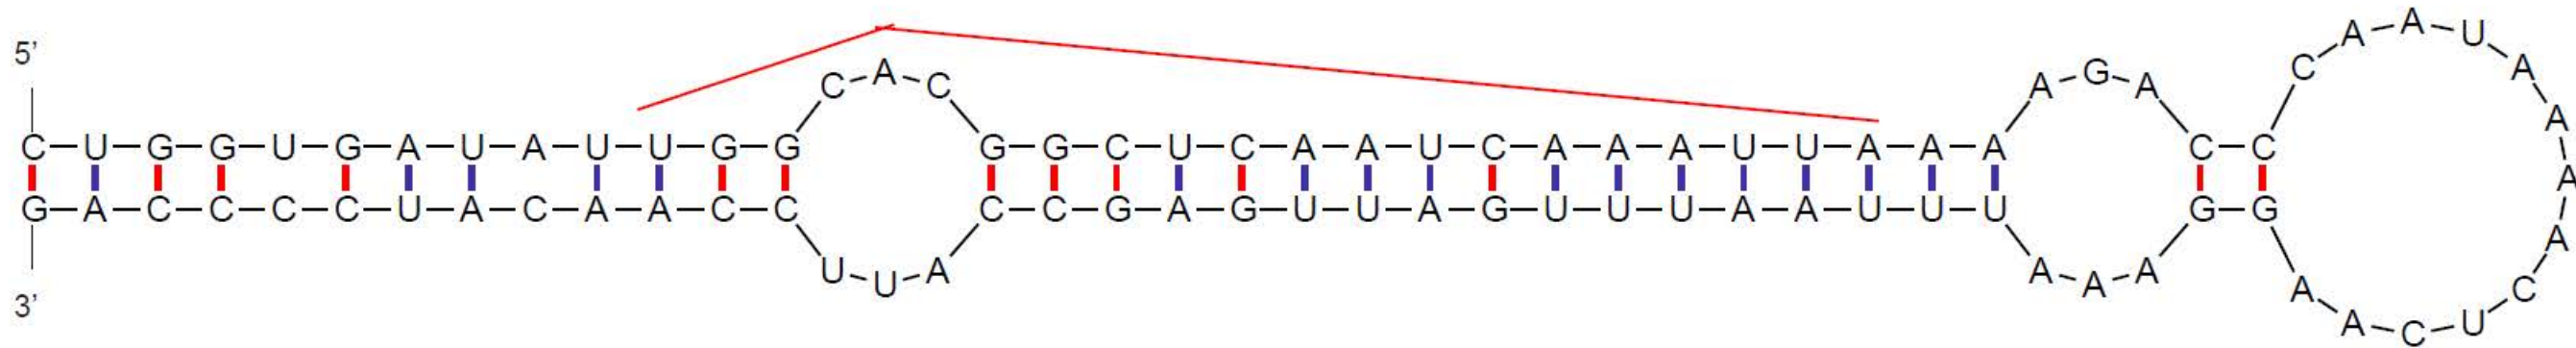



# Ghr-miR1352

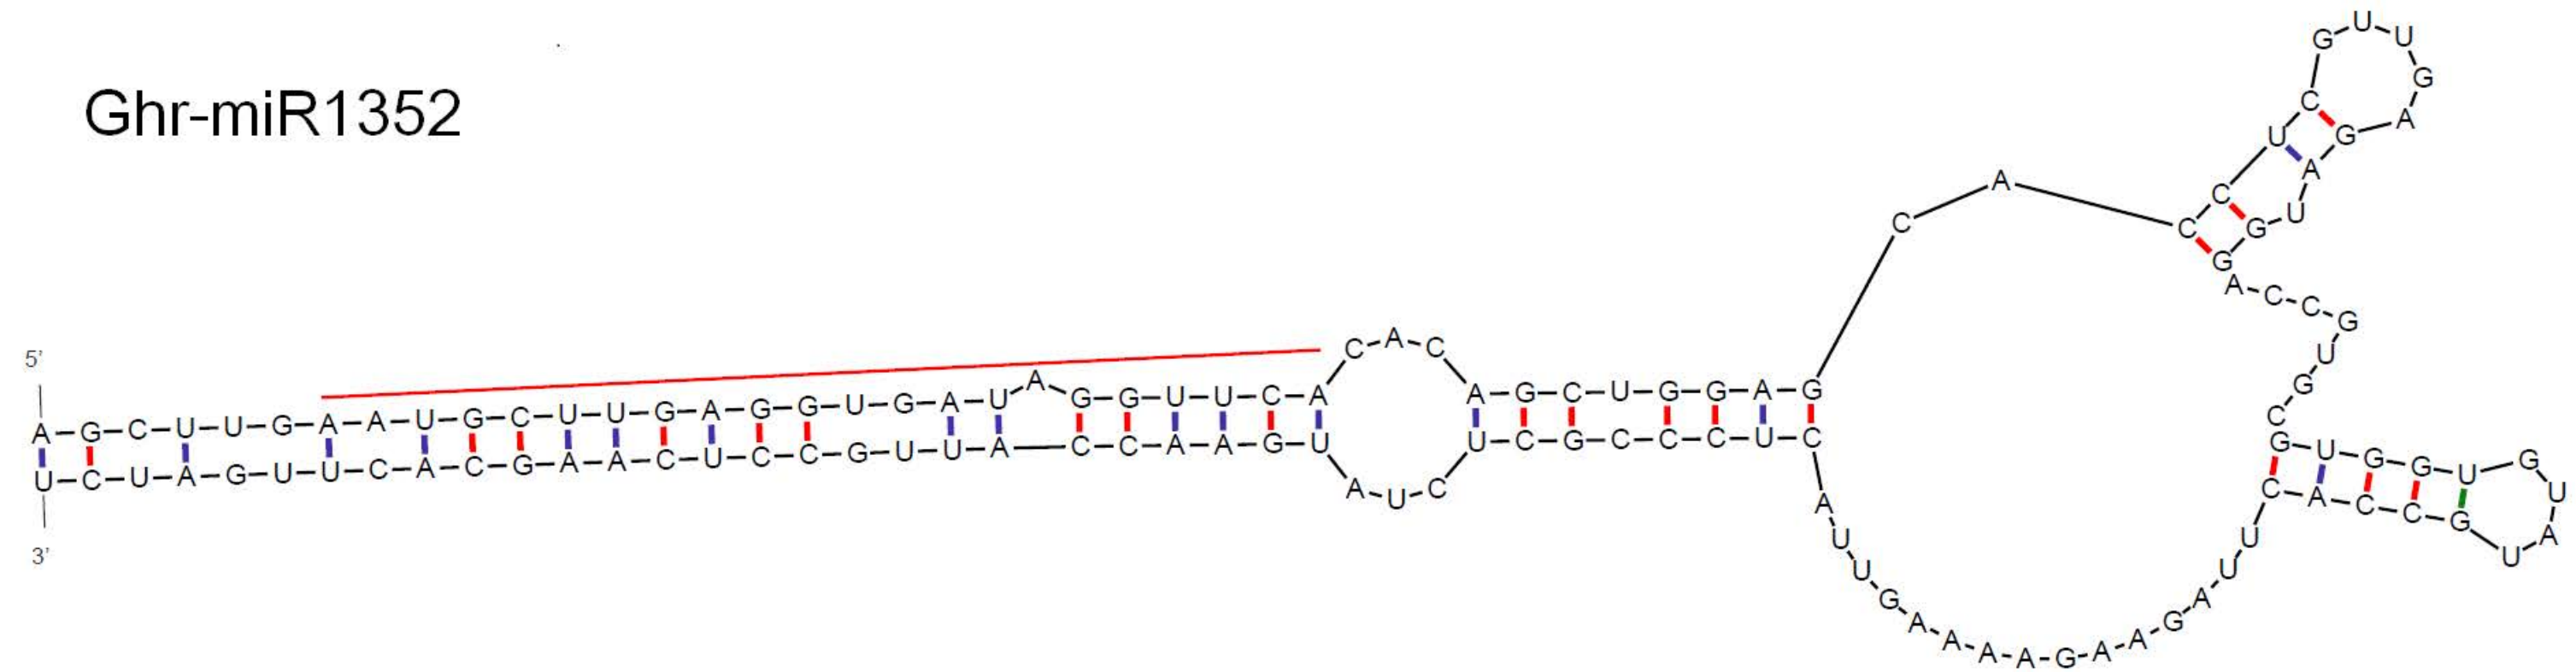

# Ghr-miR1353

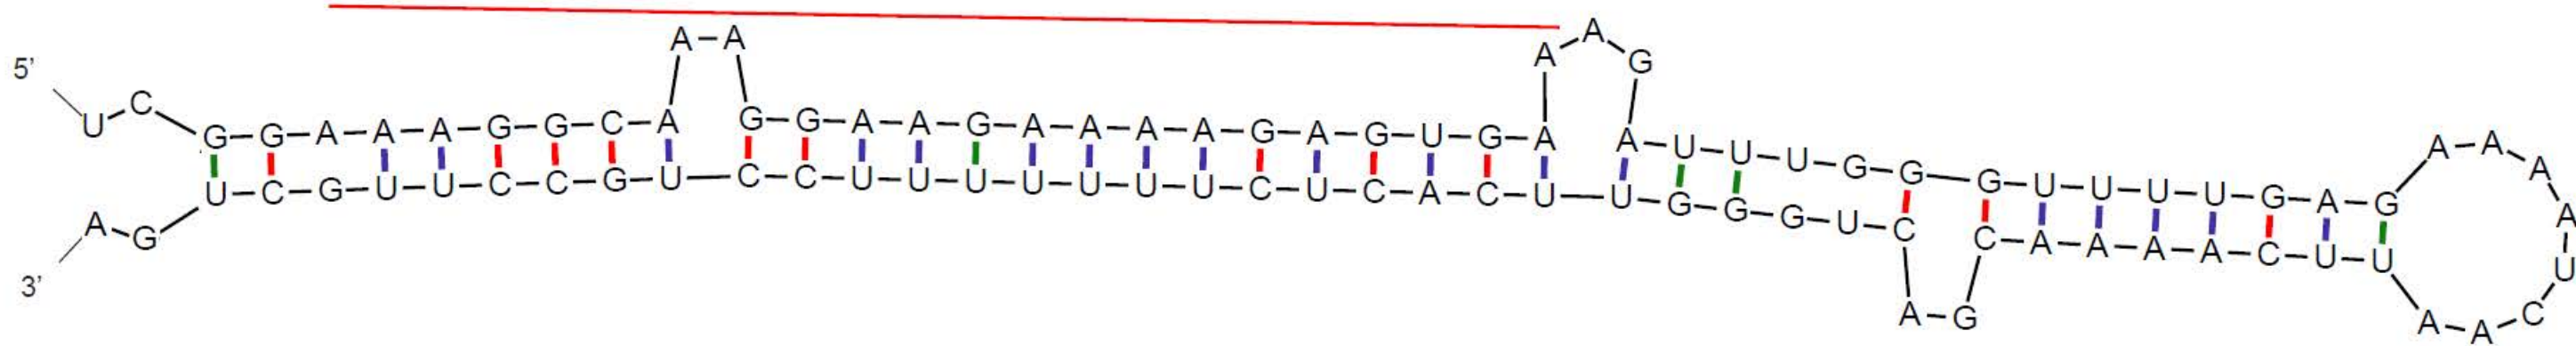

Ghr-miR1354

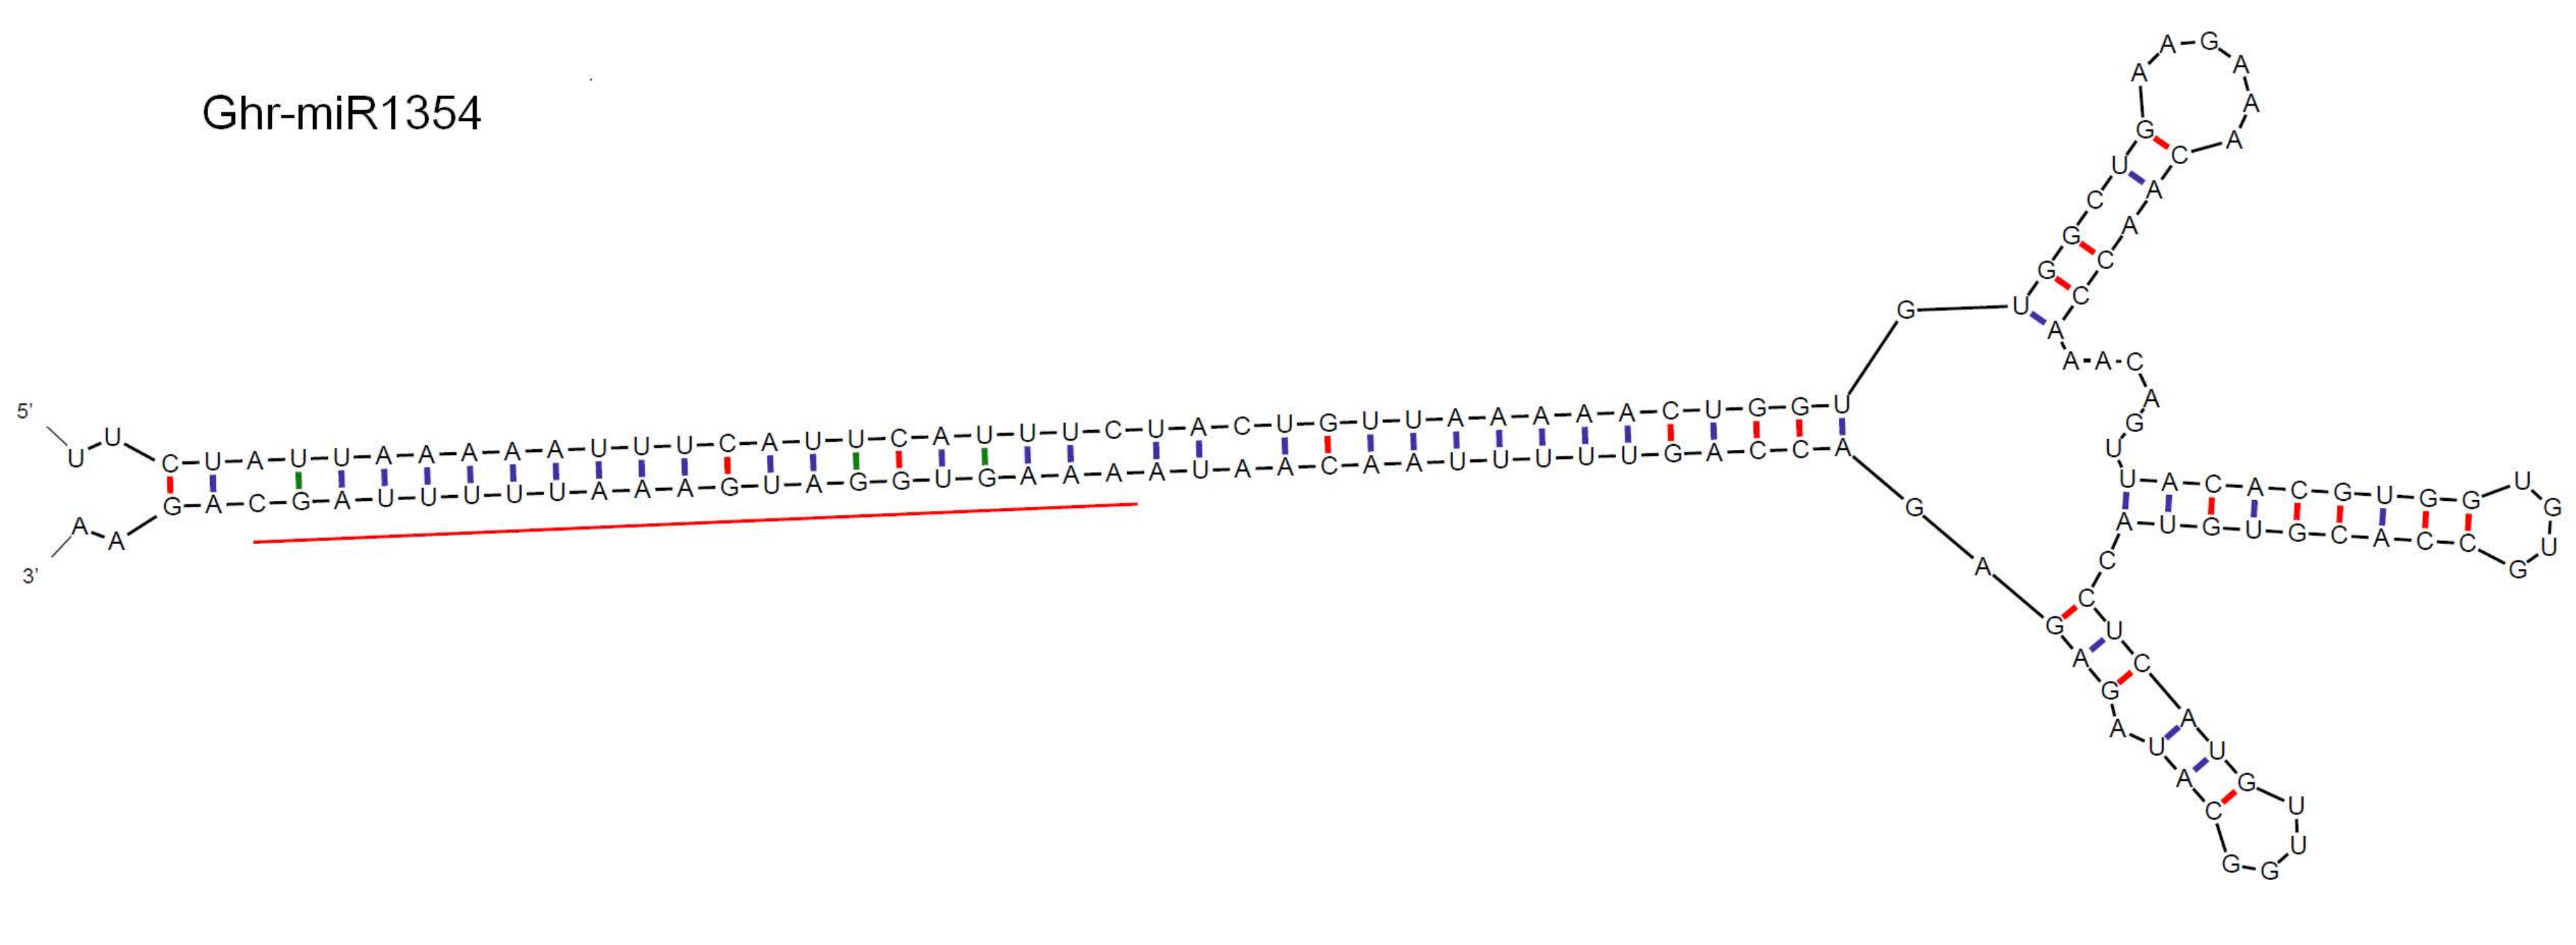

Ghr-miR1355

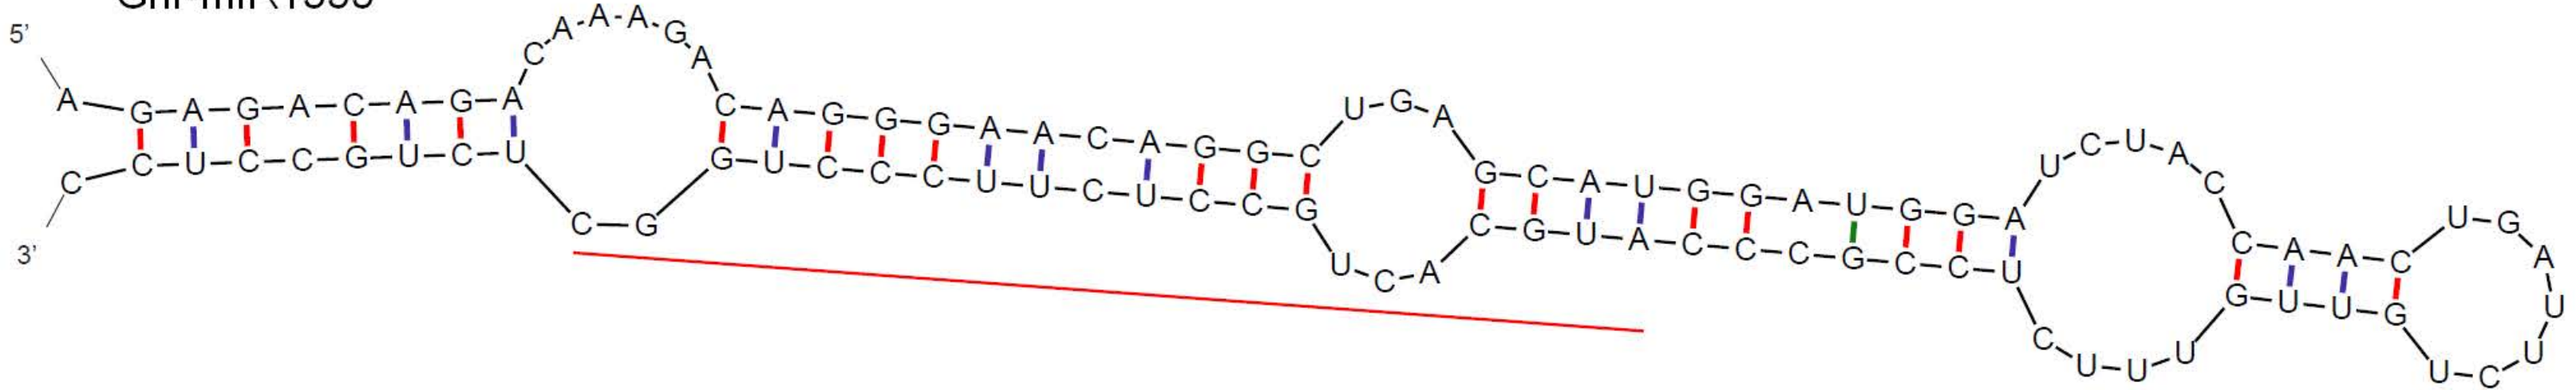

## Ghr-miR1356

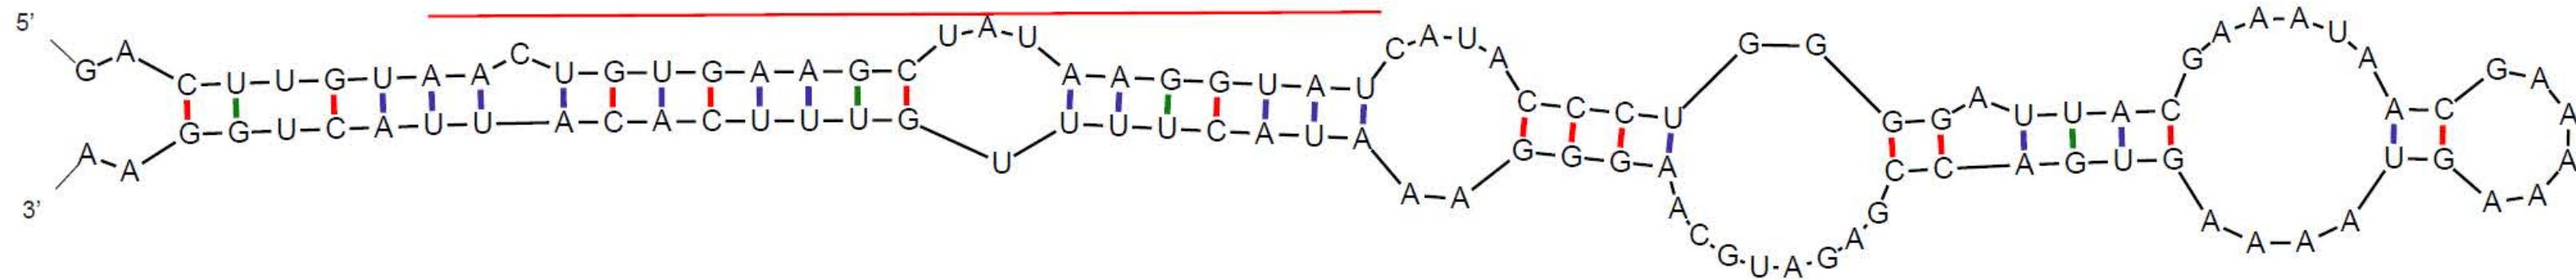



Ghr-miR1357

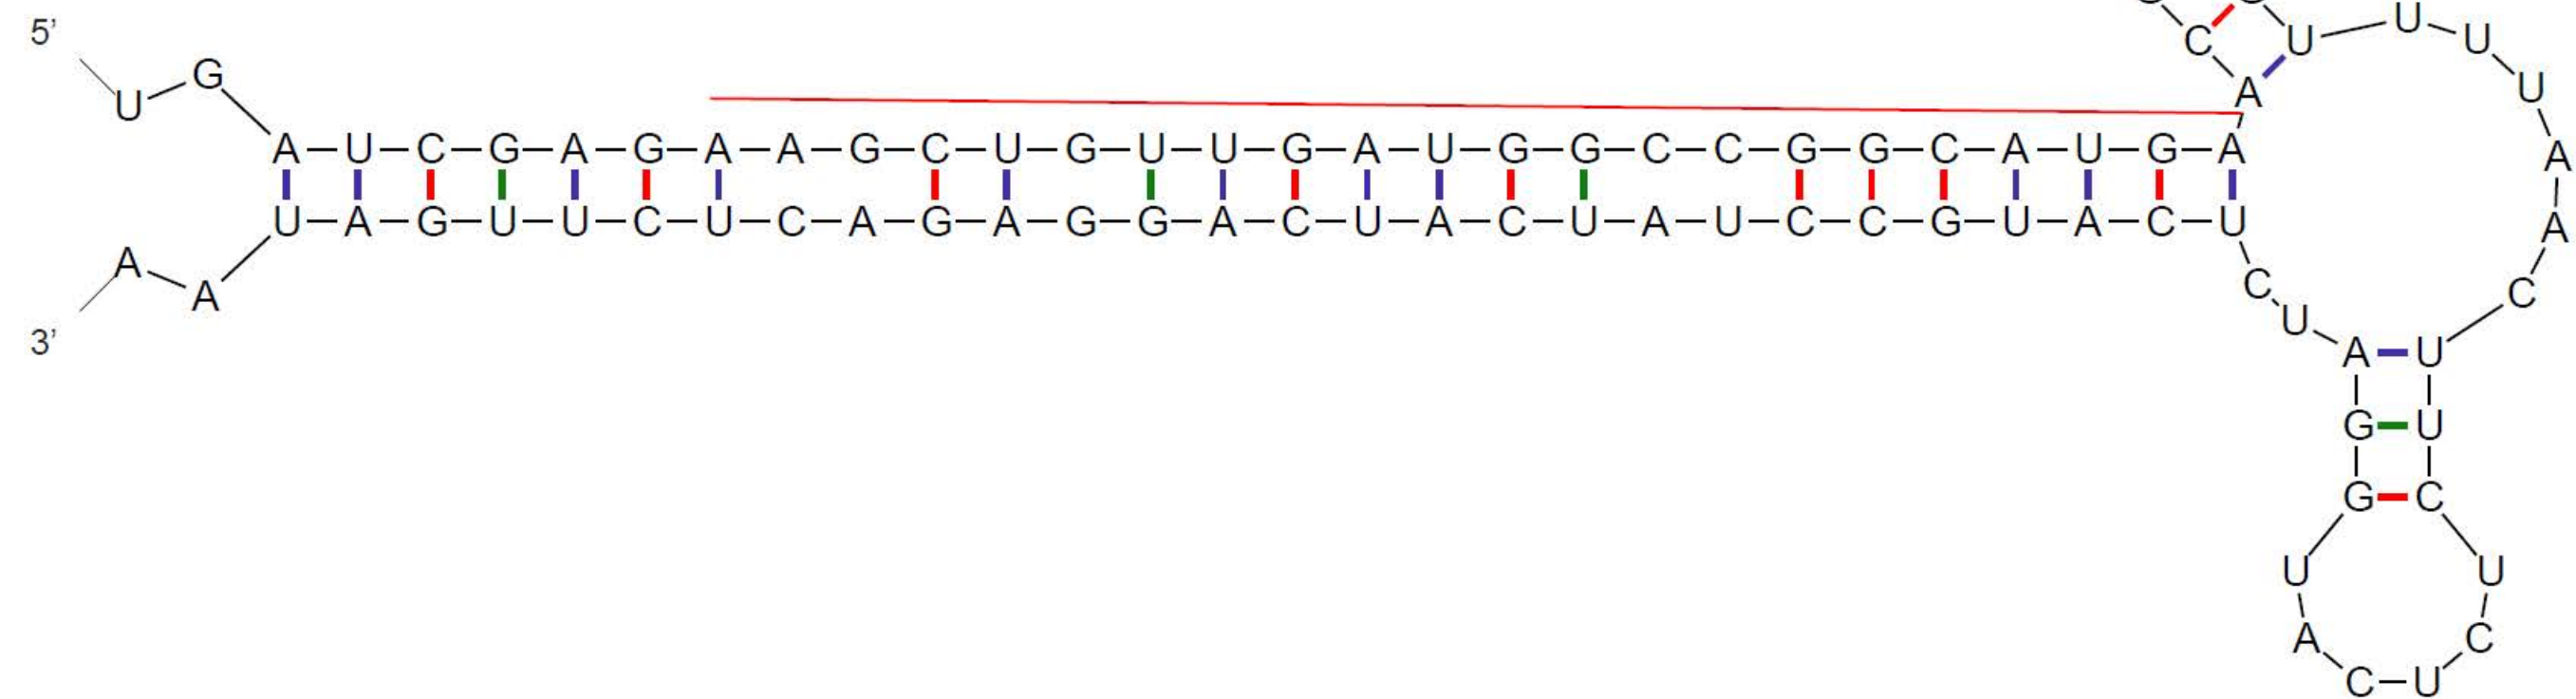

Supplement: s1 [file s1]
