# Supplementary material for: Comparative Analysis of Cotton Small RNAs and Their Target Genes in Response to Salt Stress
Source: MDPI journal article supplement (doi:10.3390/genes8120369), 2017-12-05
Supplement: s1 [file s1]

Dissociation Curve

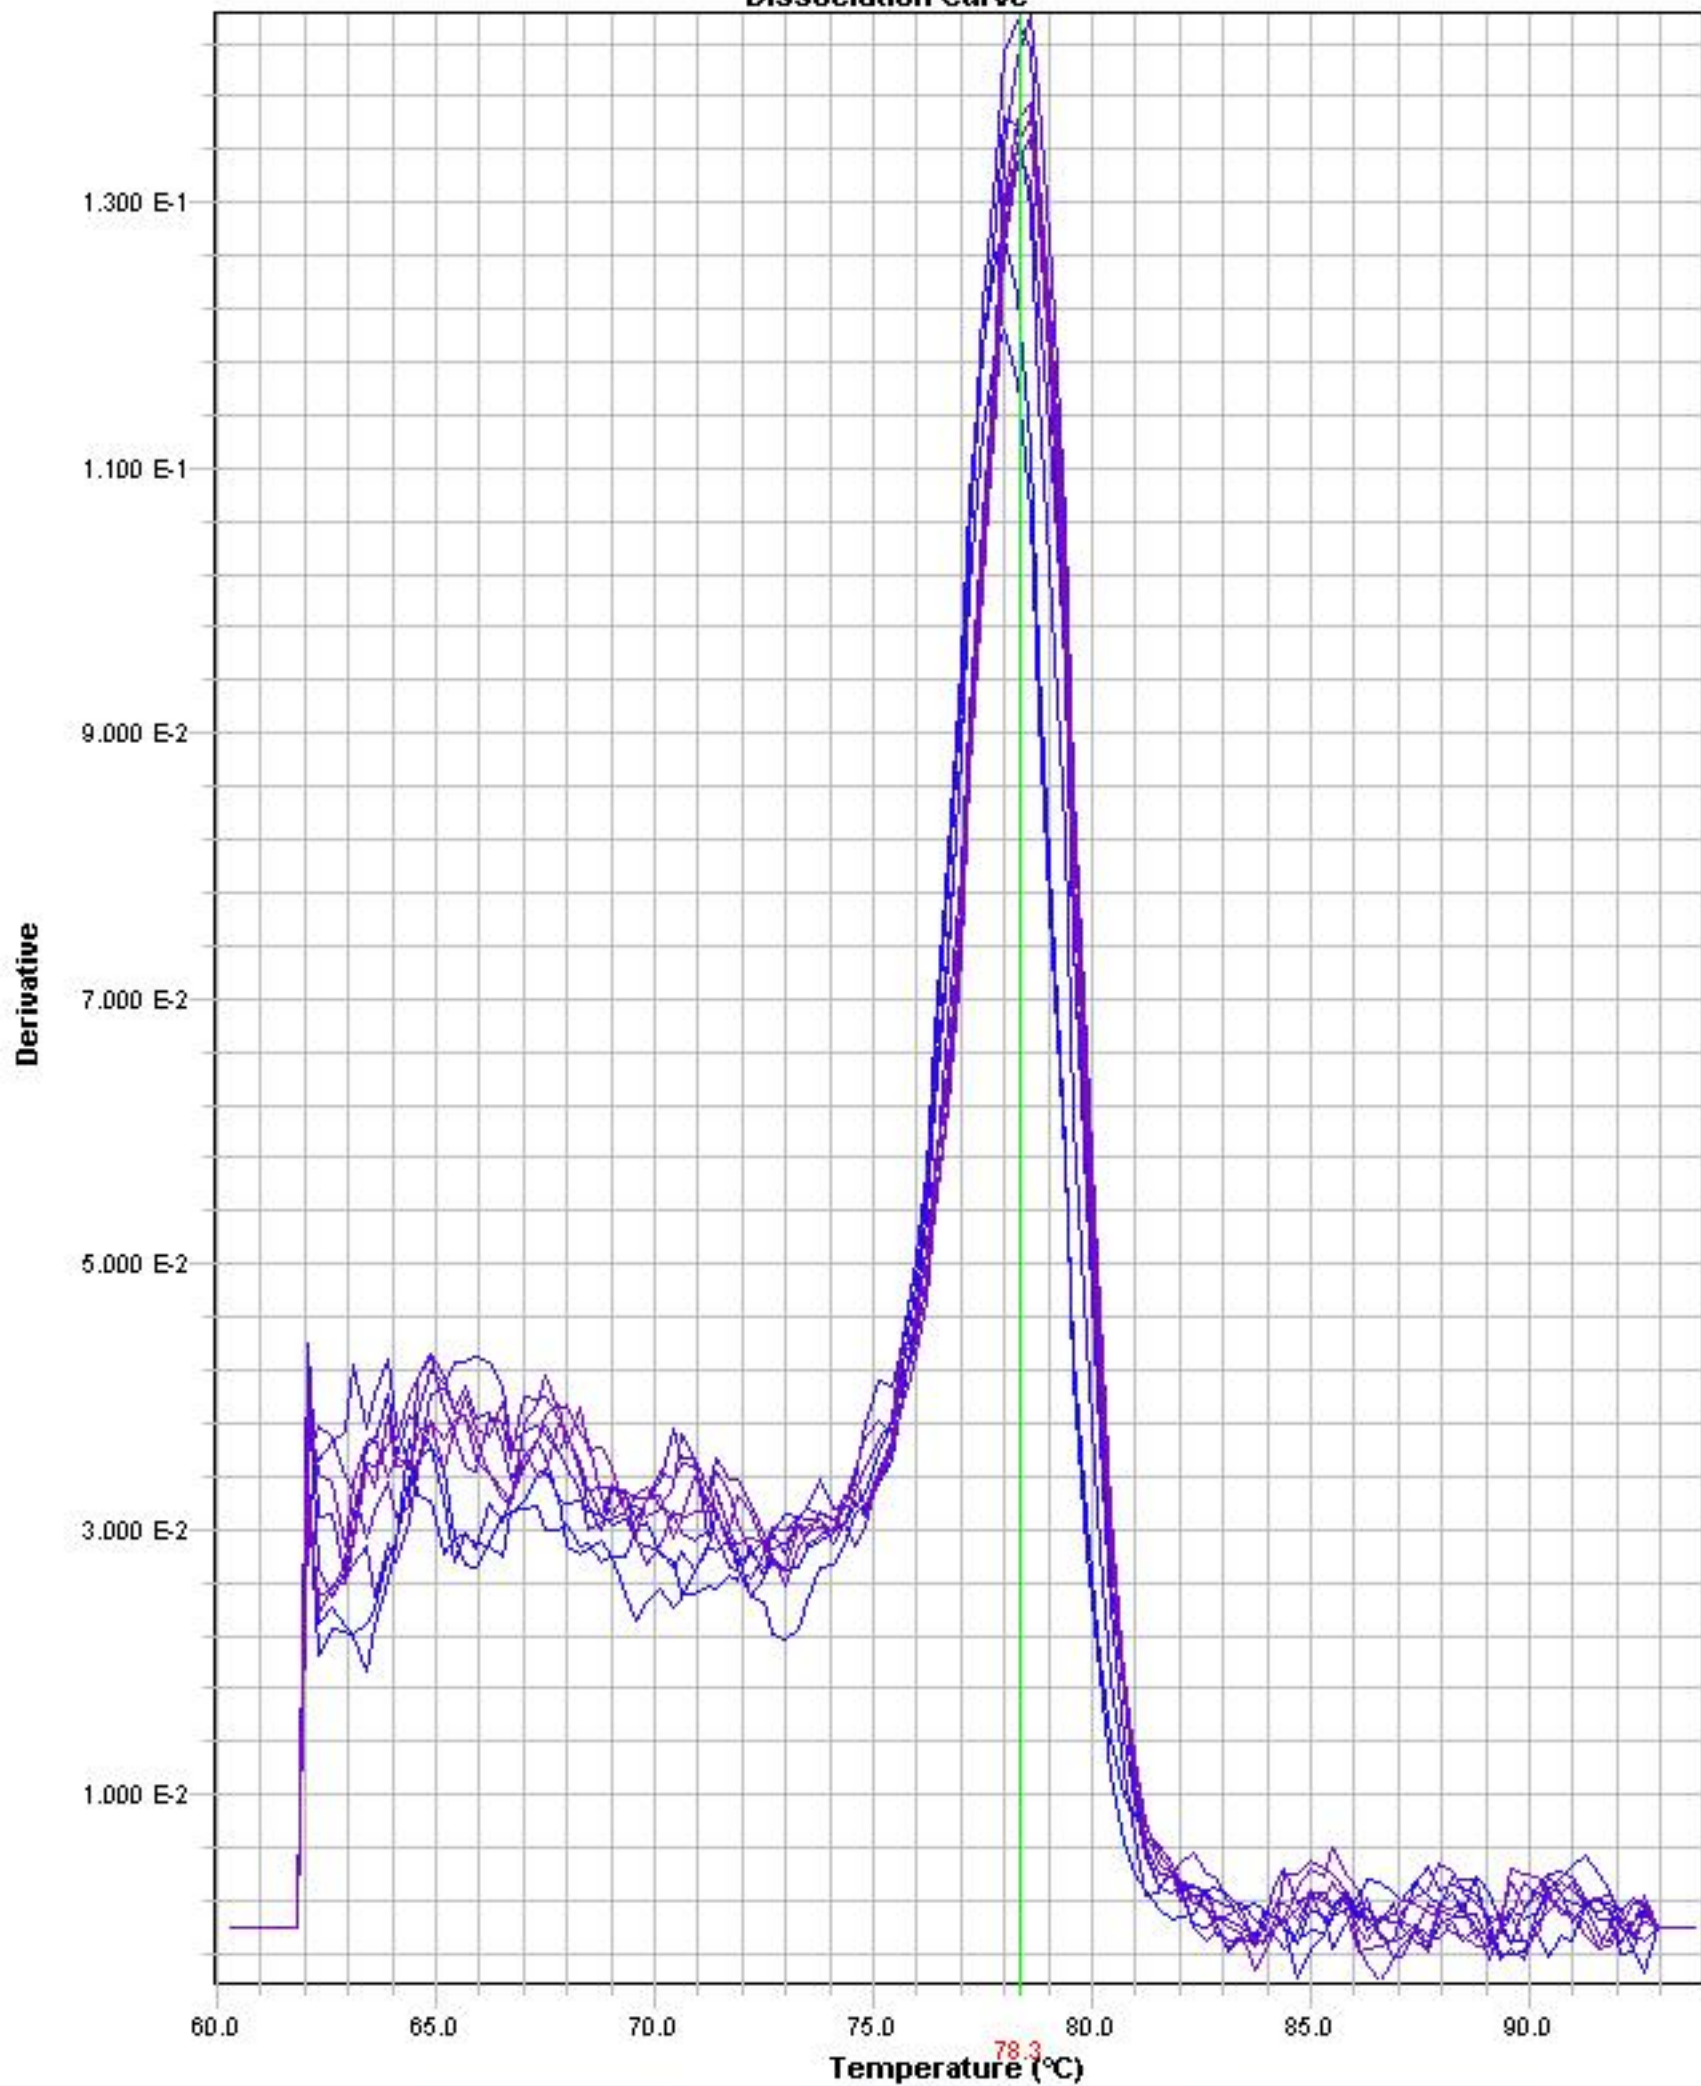

Detector: miR-160c

Plot: Derivative

Step: Stage 3, step 3

Dissociation Curve

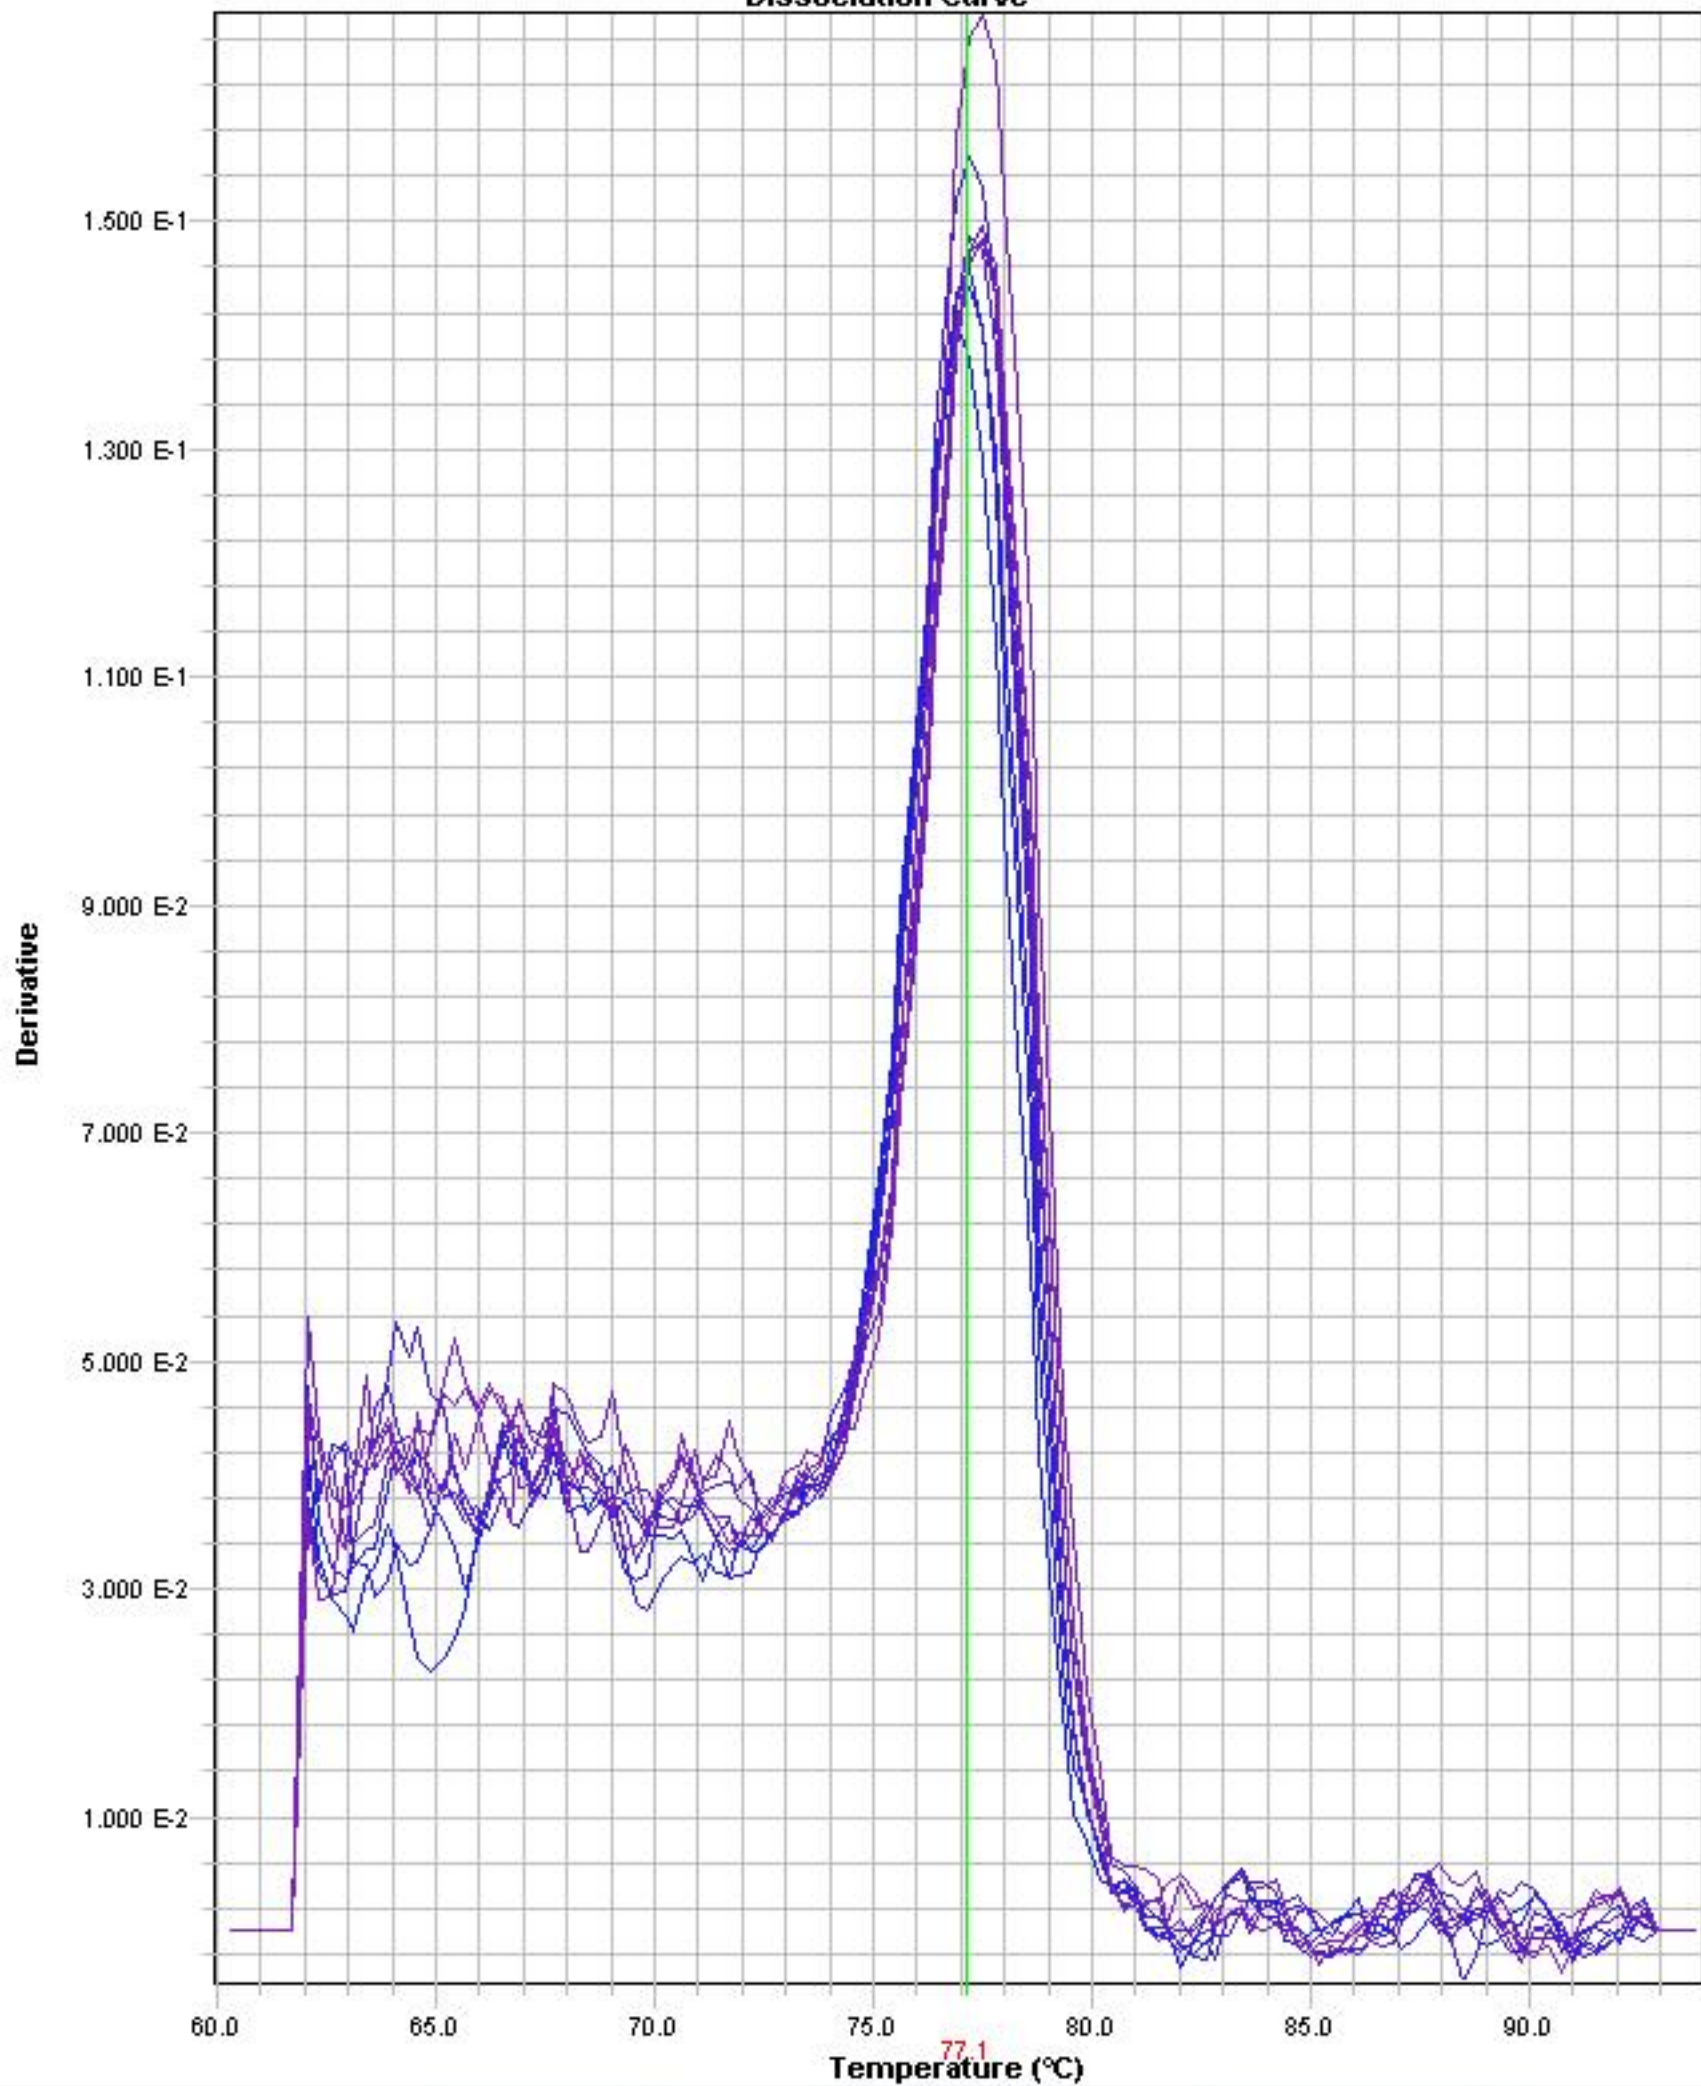

Detector:

Plot:

Step:

Dissociation Curve

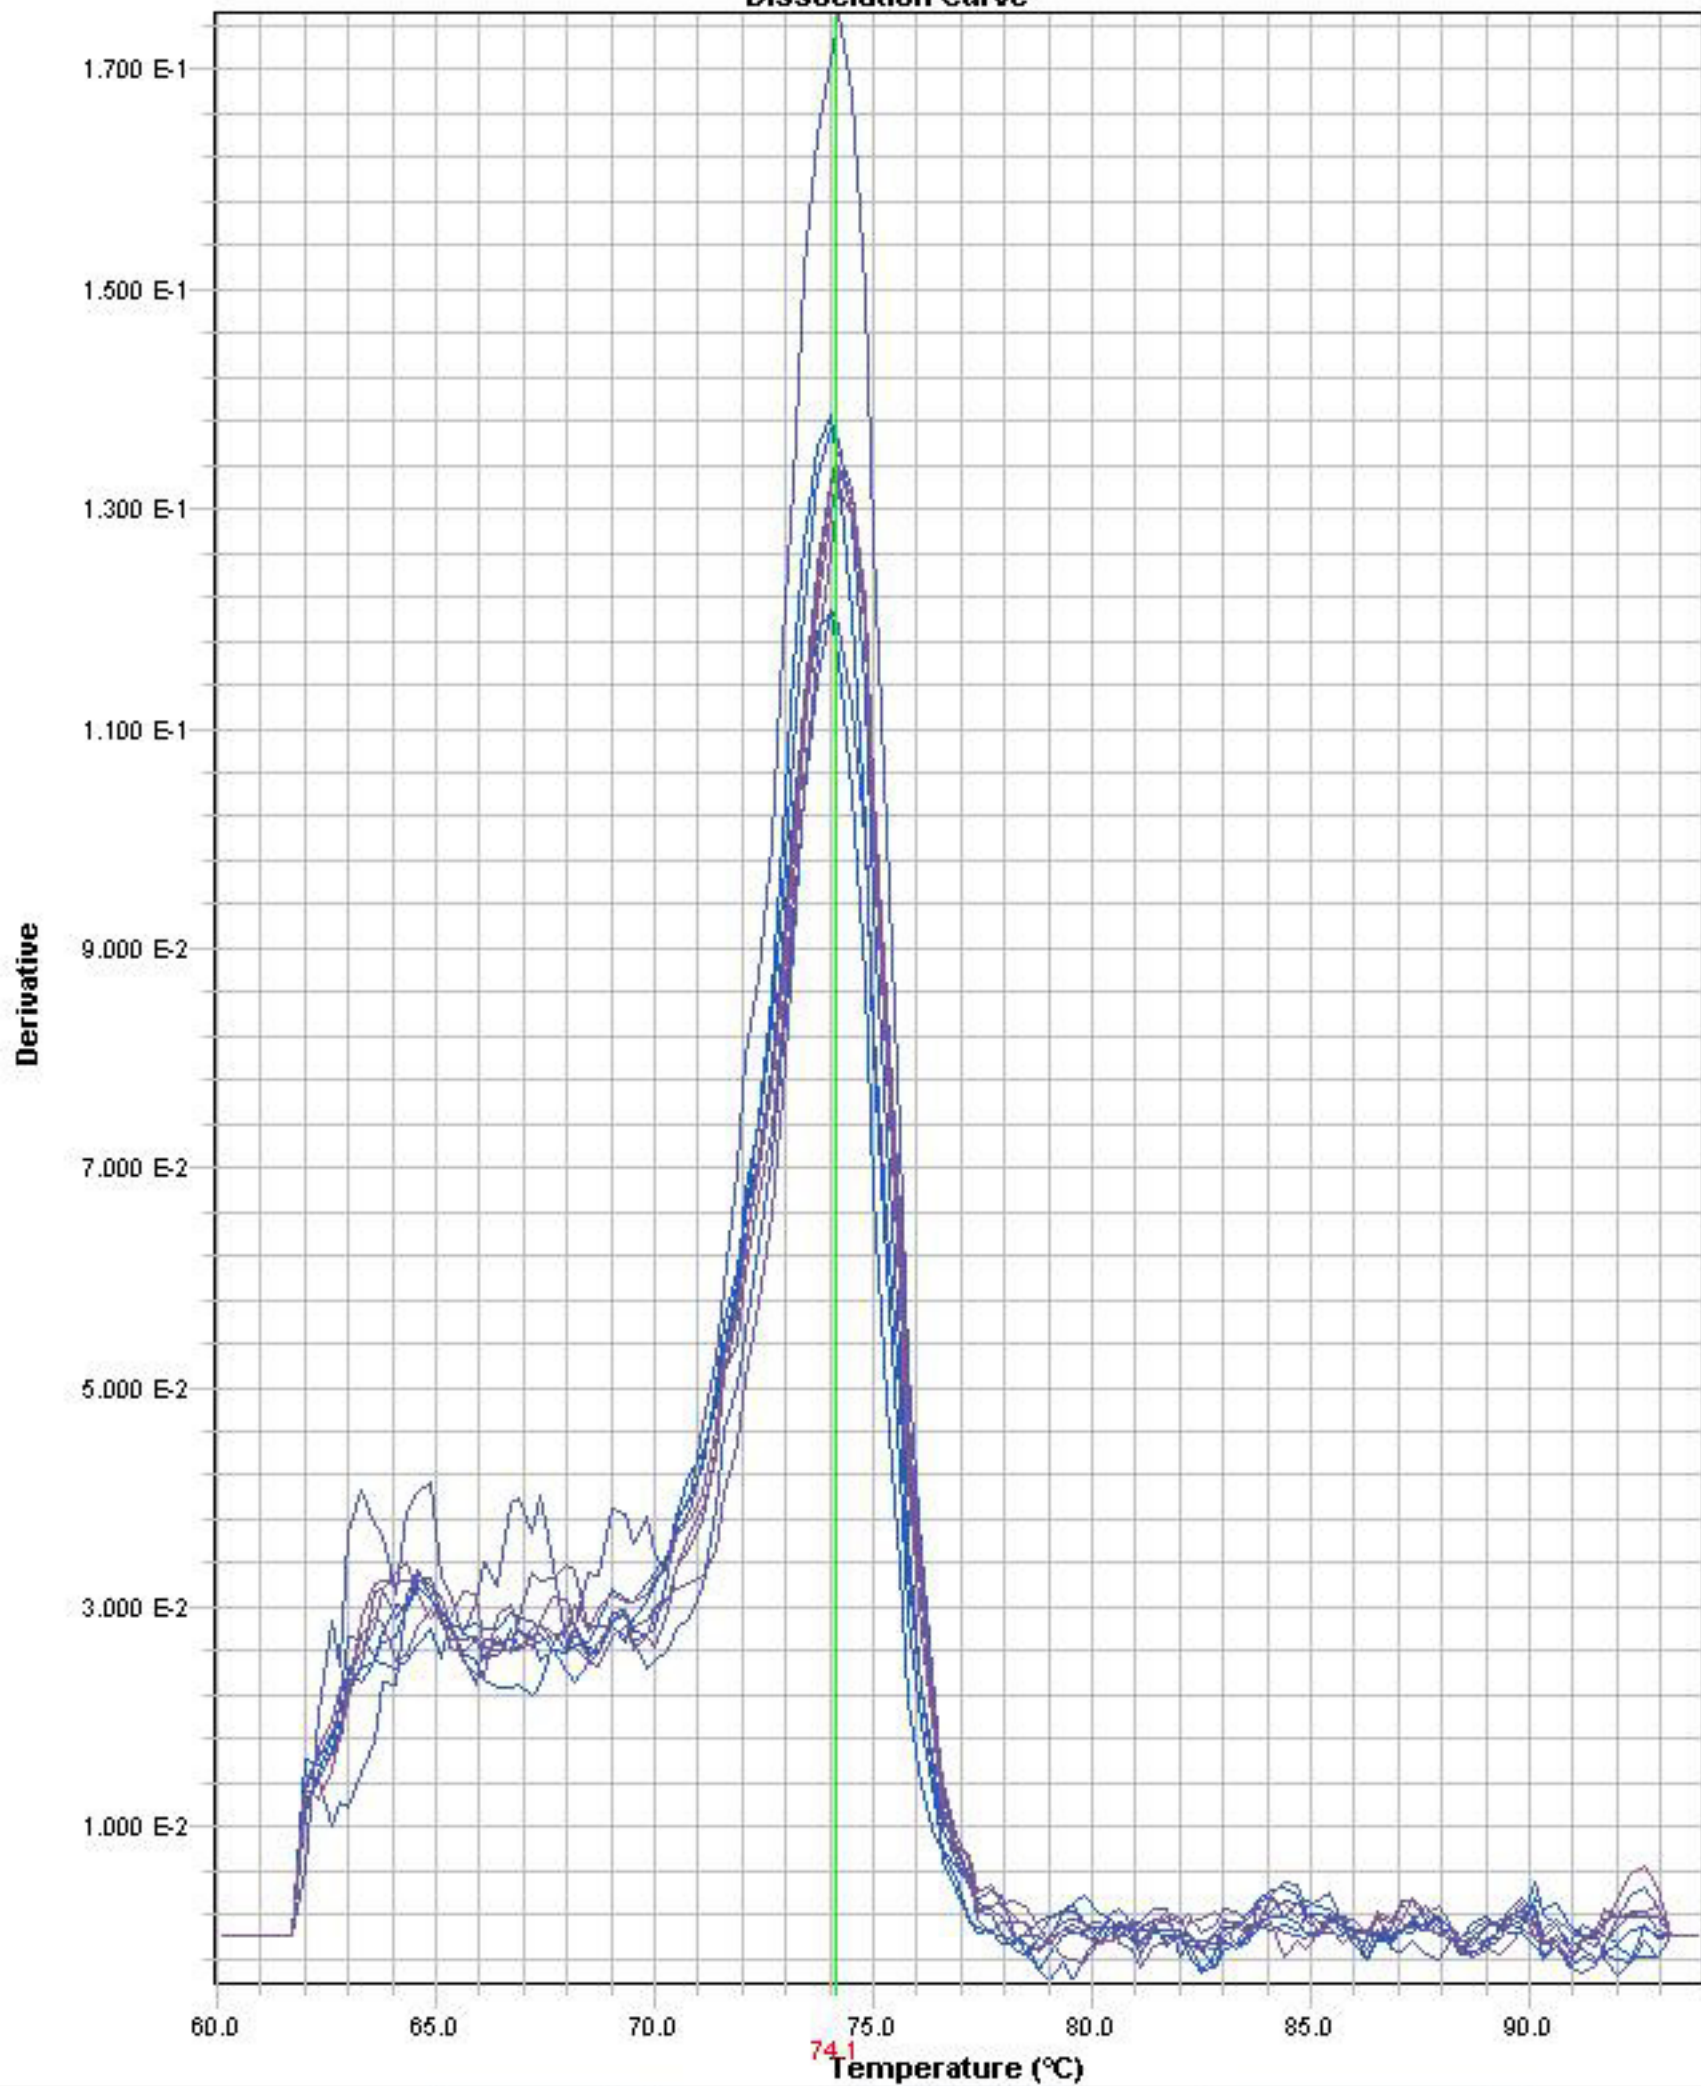

Detector:

Plot:

Step:



Dissociation Curve

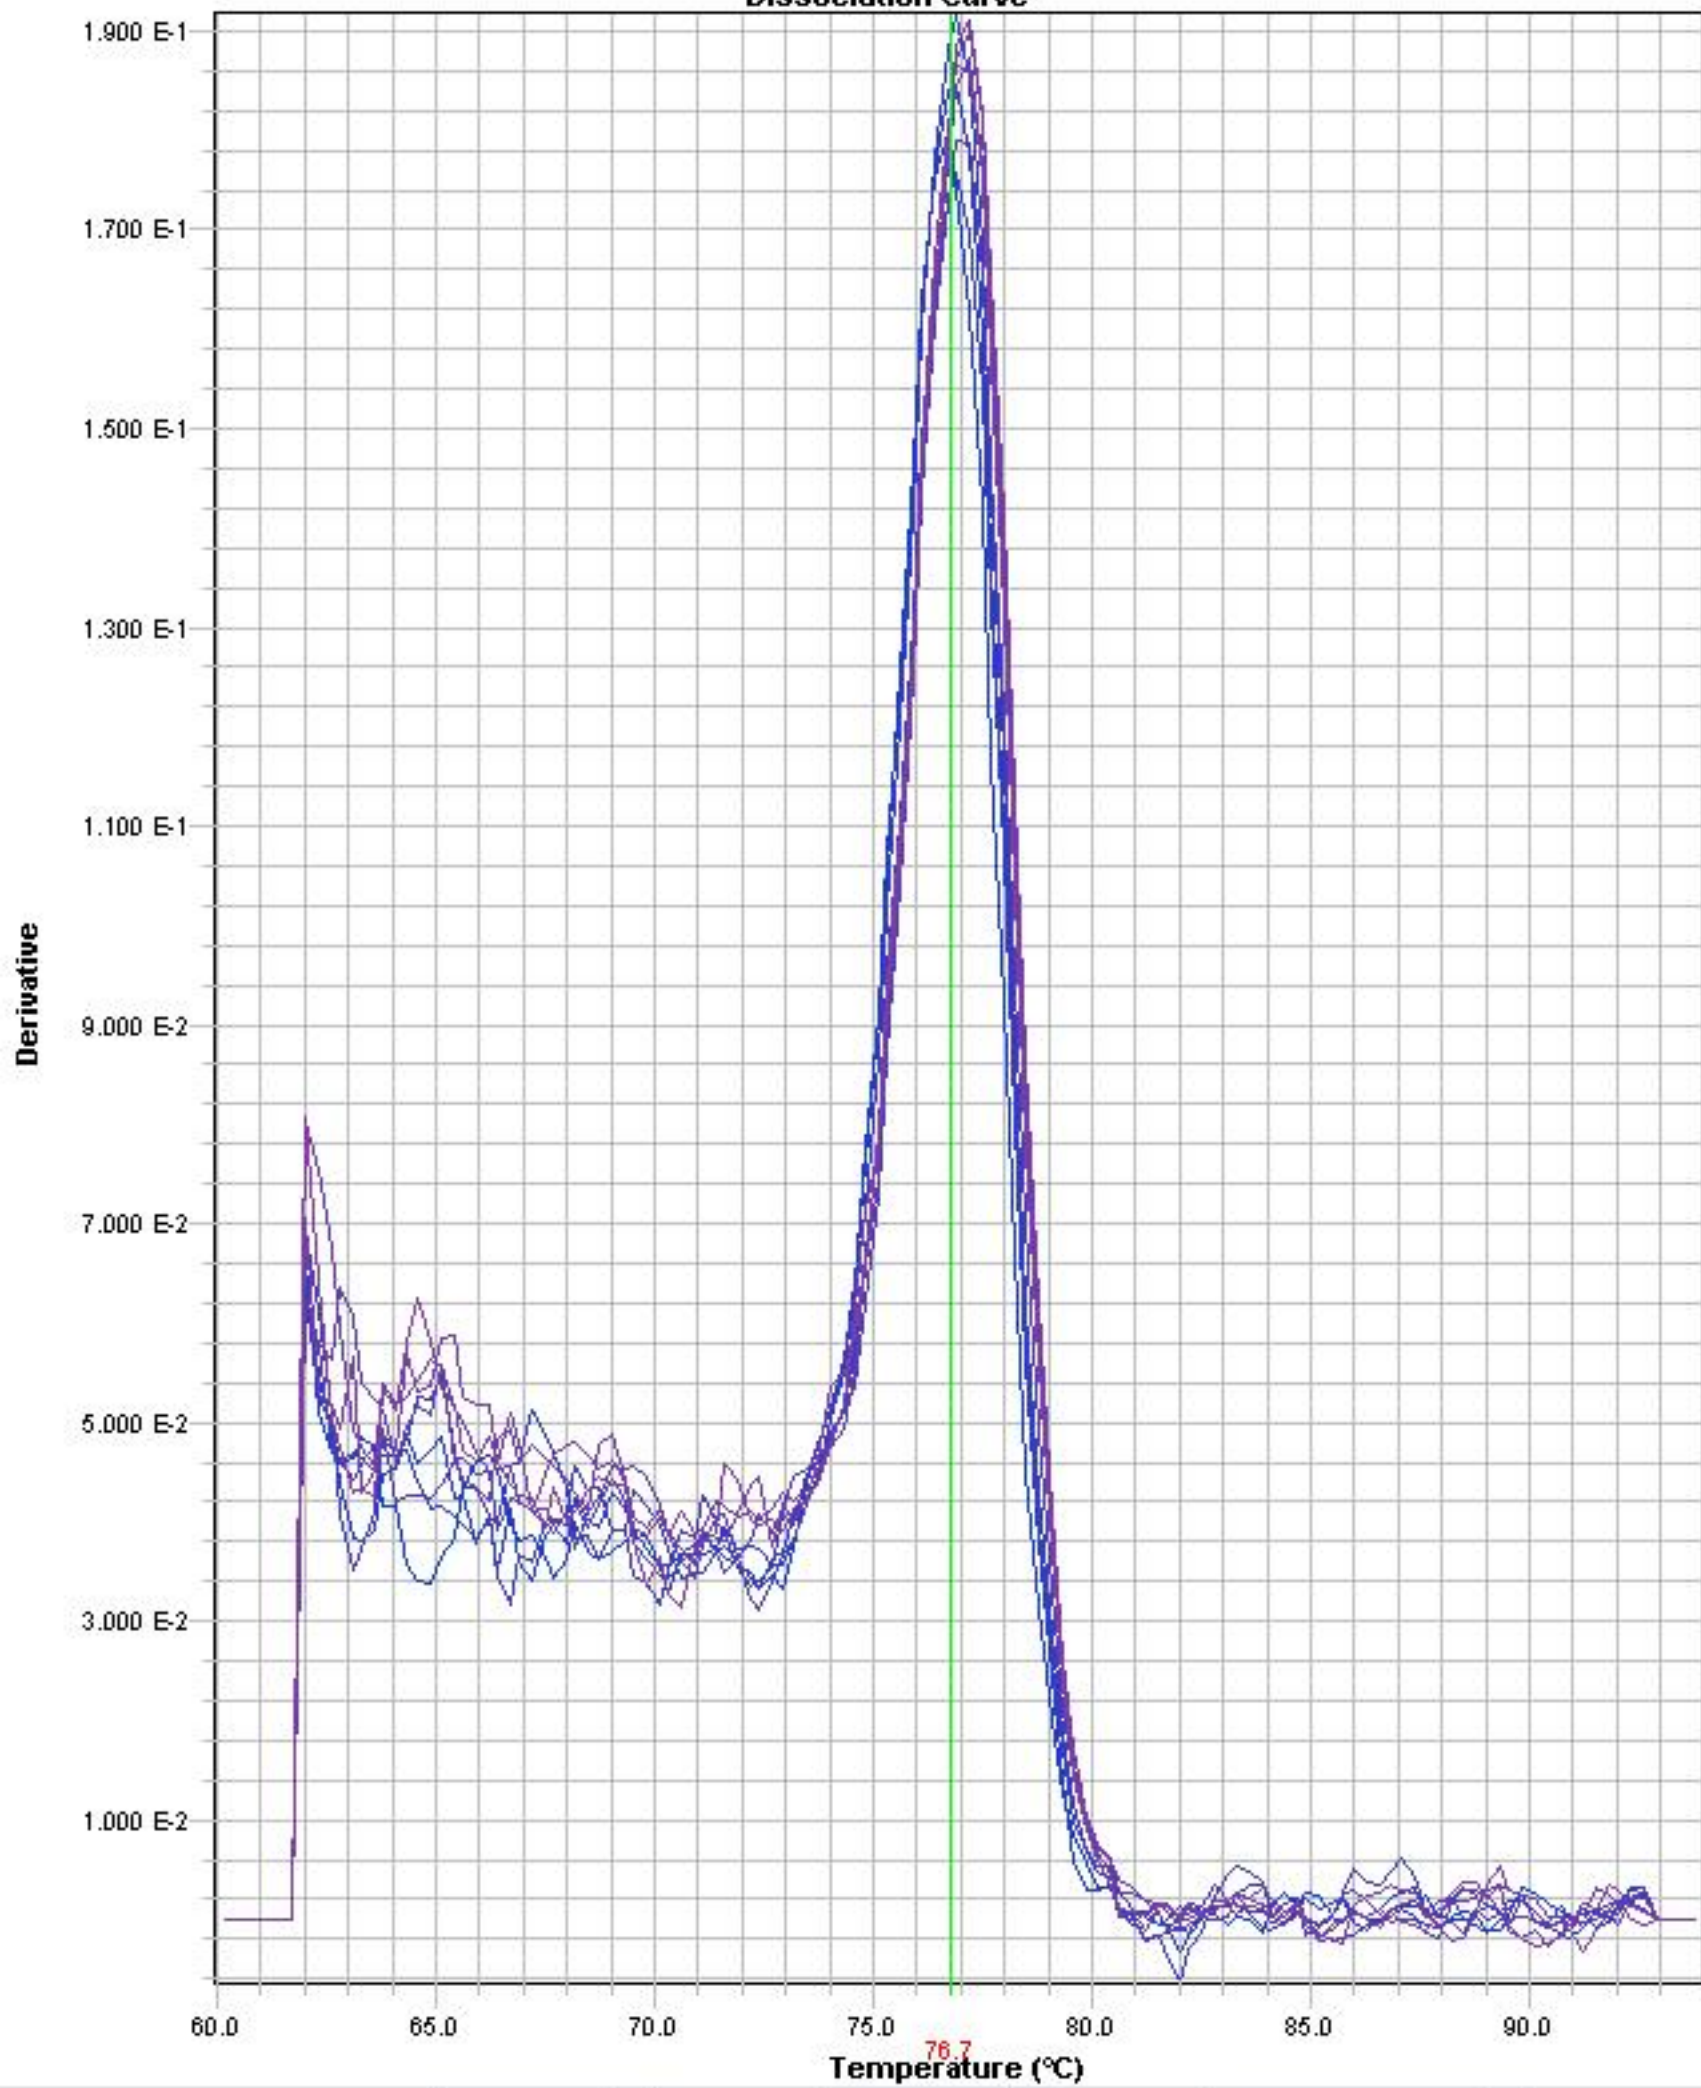

Detector: miR-1344 ▼

Plot: Derivative ▼

Step: Stage 3, step 3 ▼

Dissociation Curve

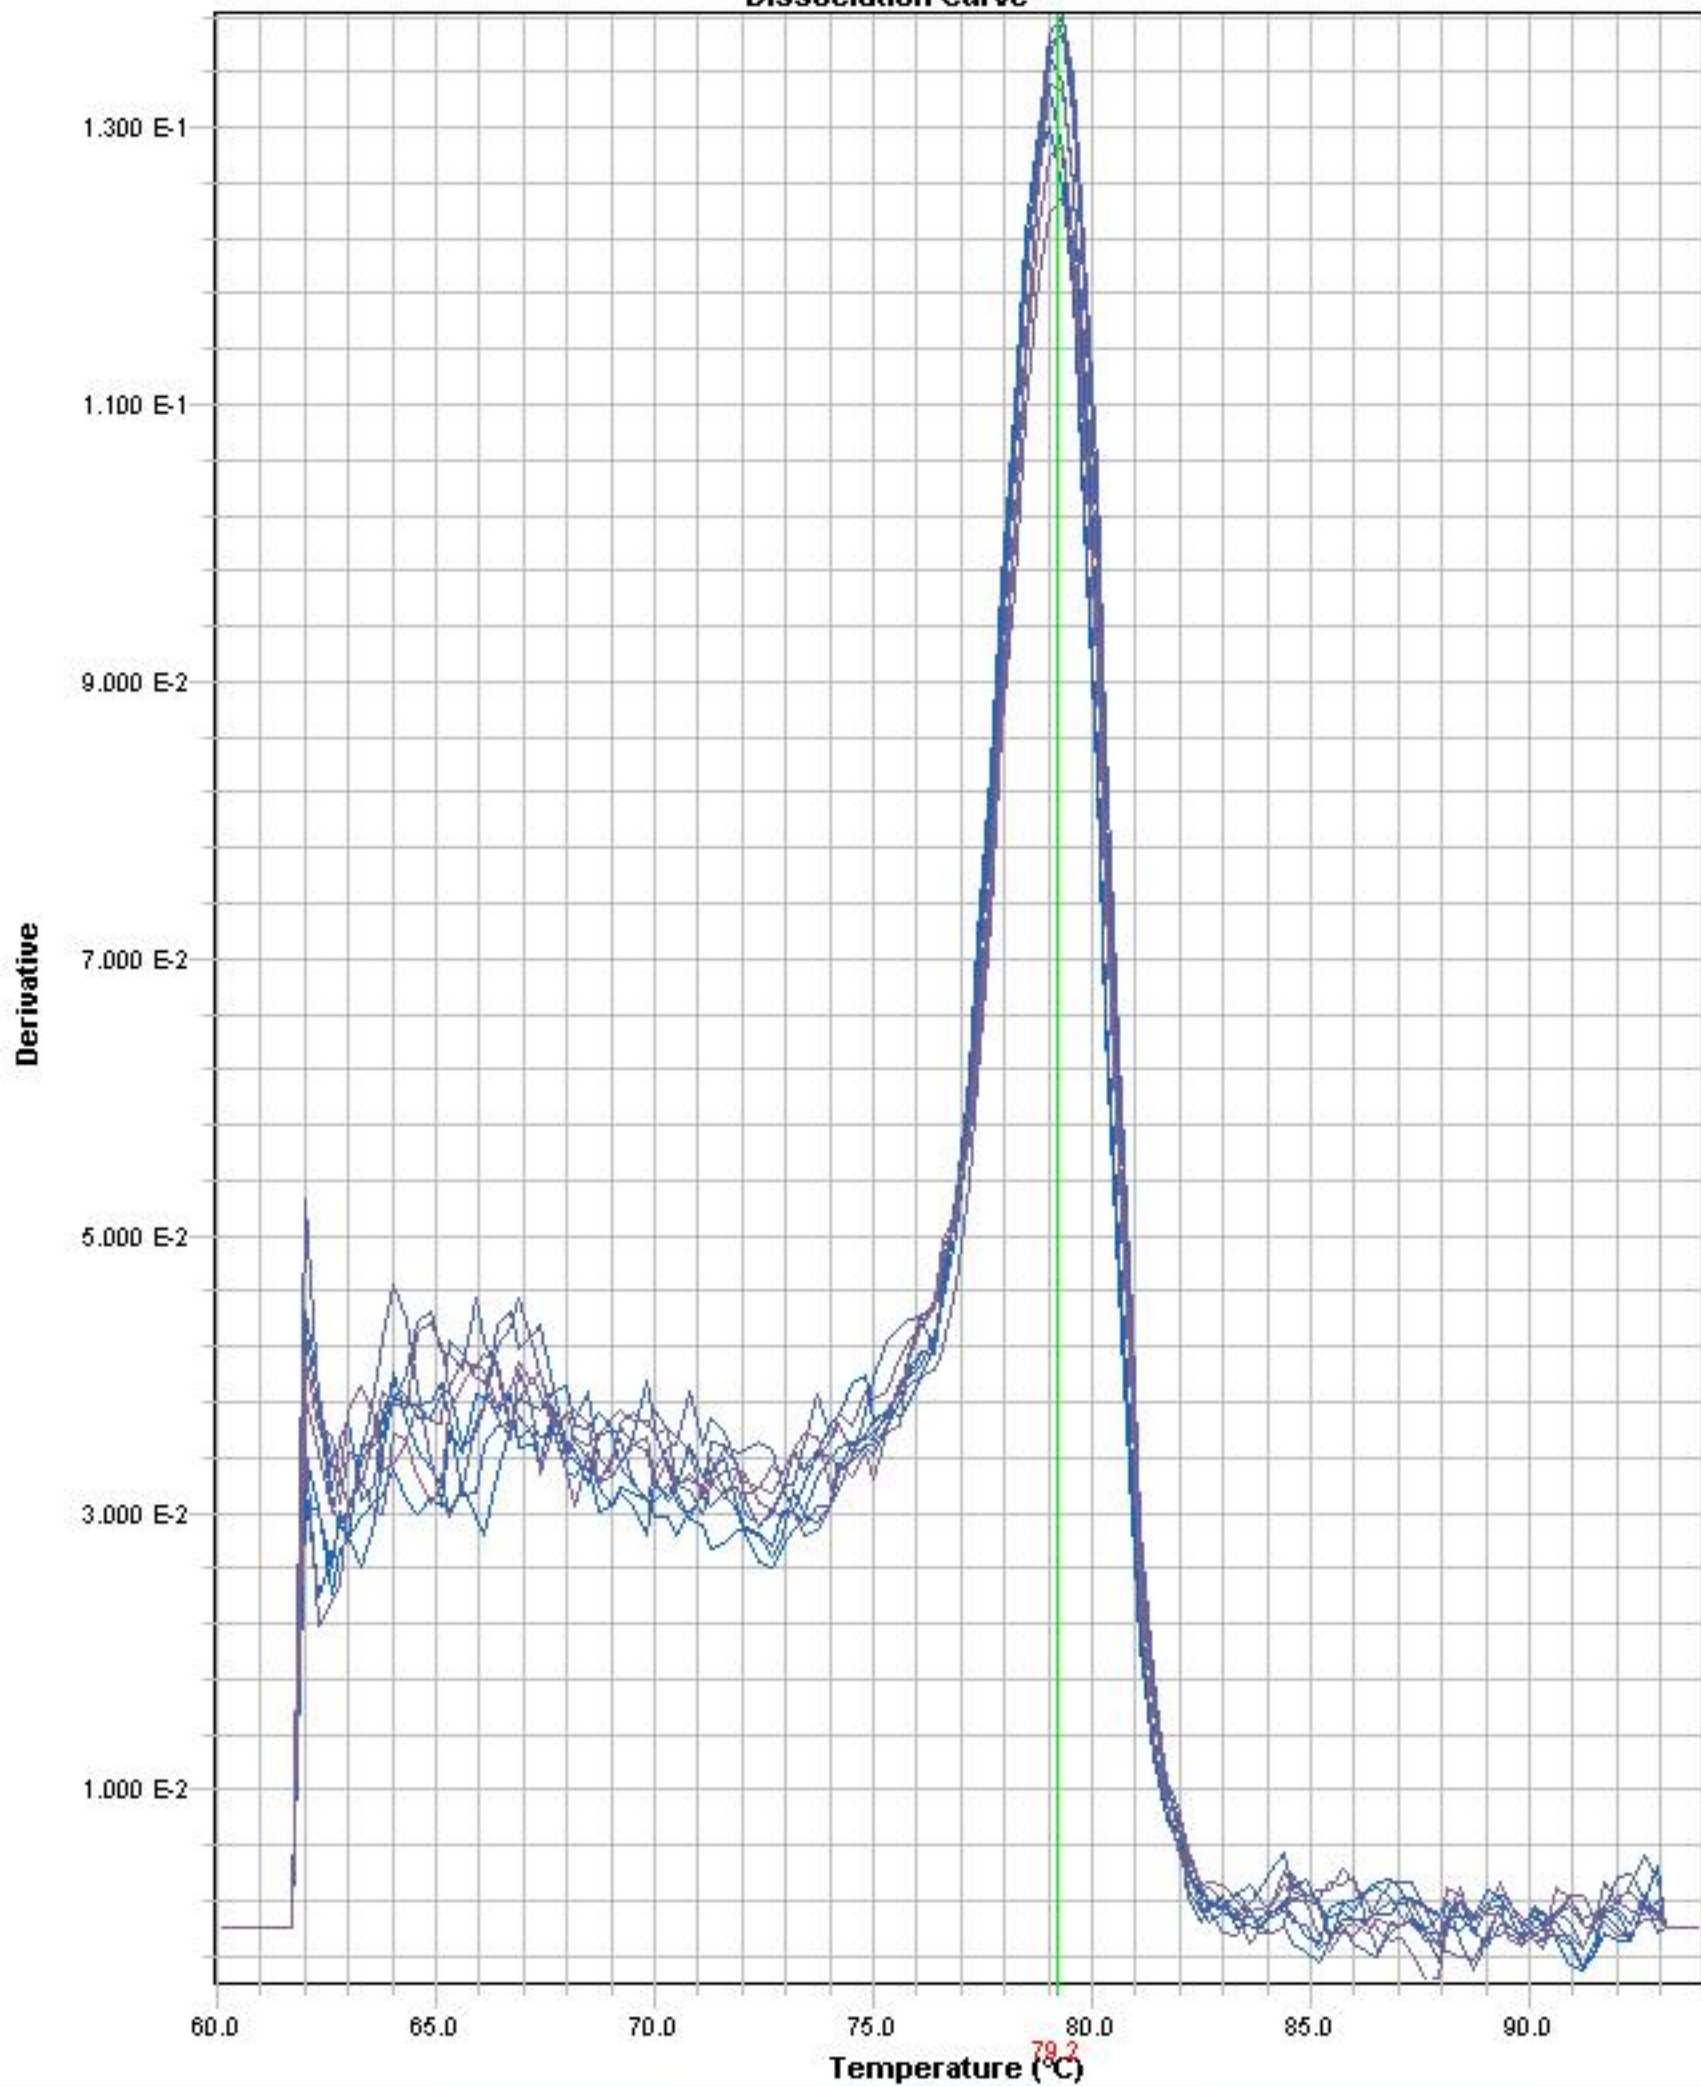

Detector: miR-1355-1 ▼

Plot: Derivative ▼

Step: Stage 3, step 3 ▼

Dissociation Curve

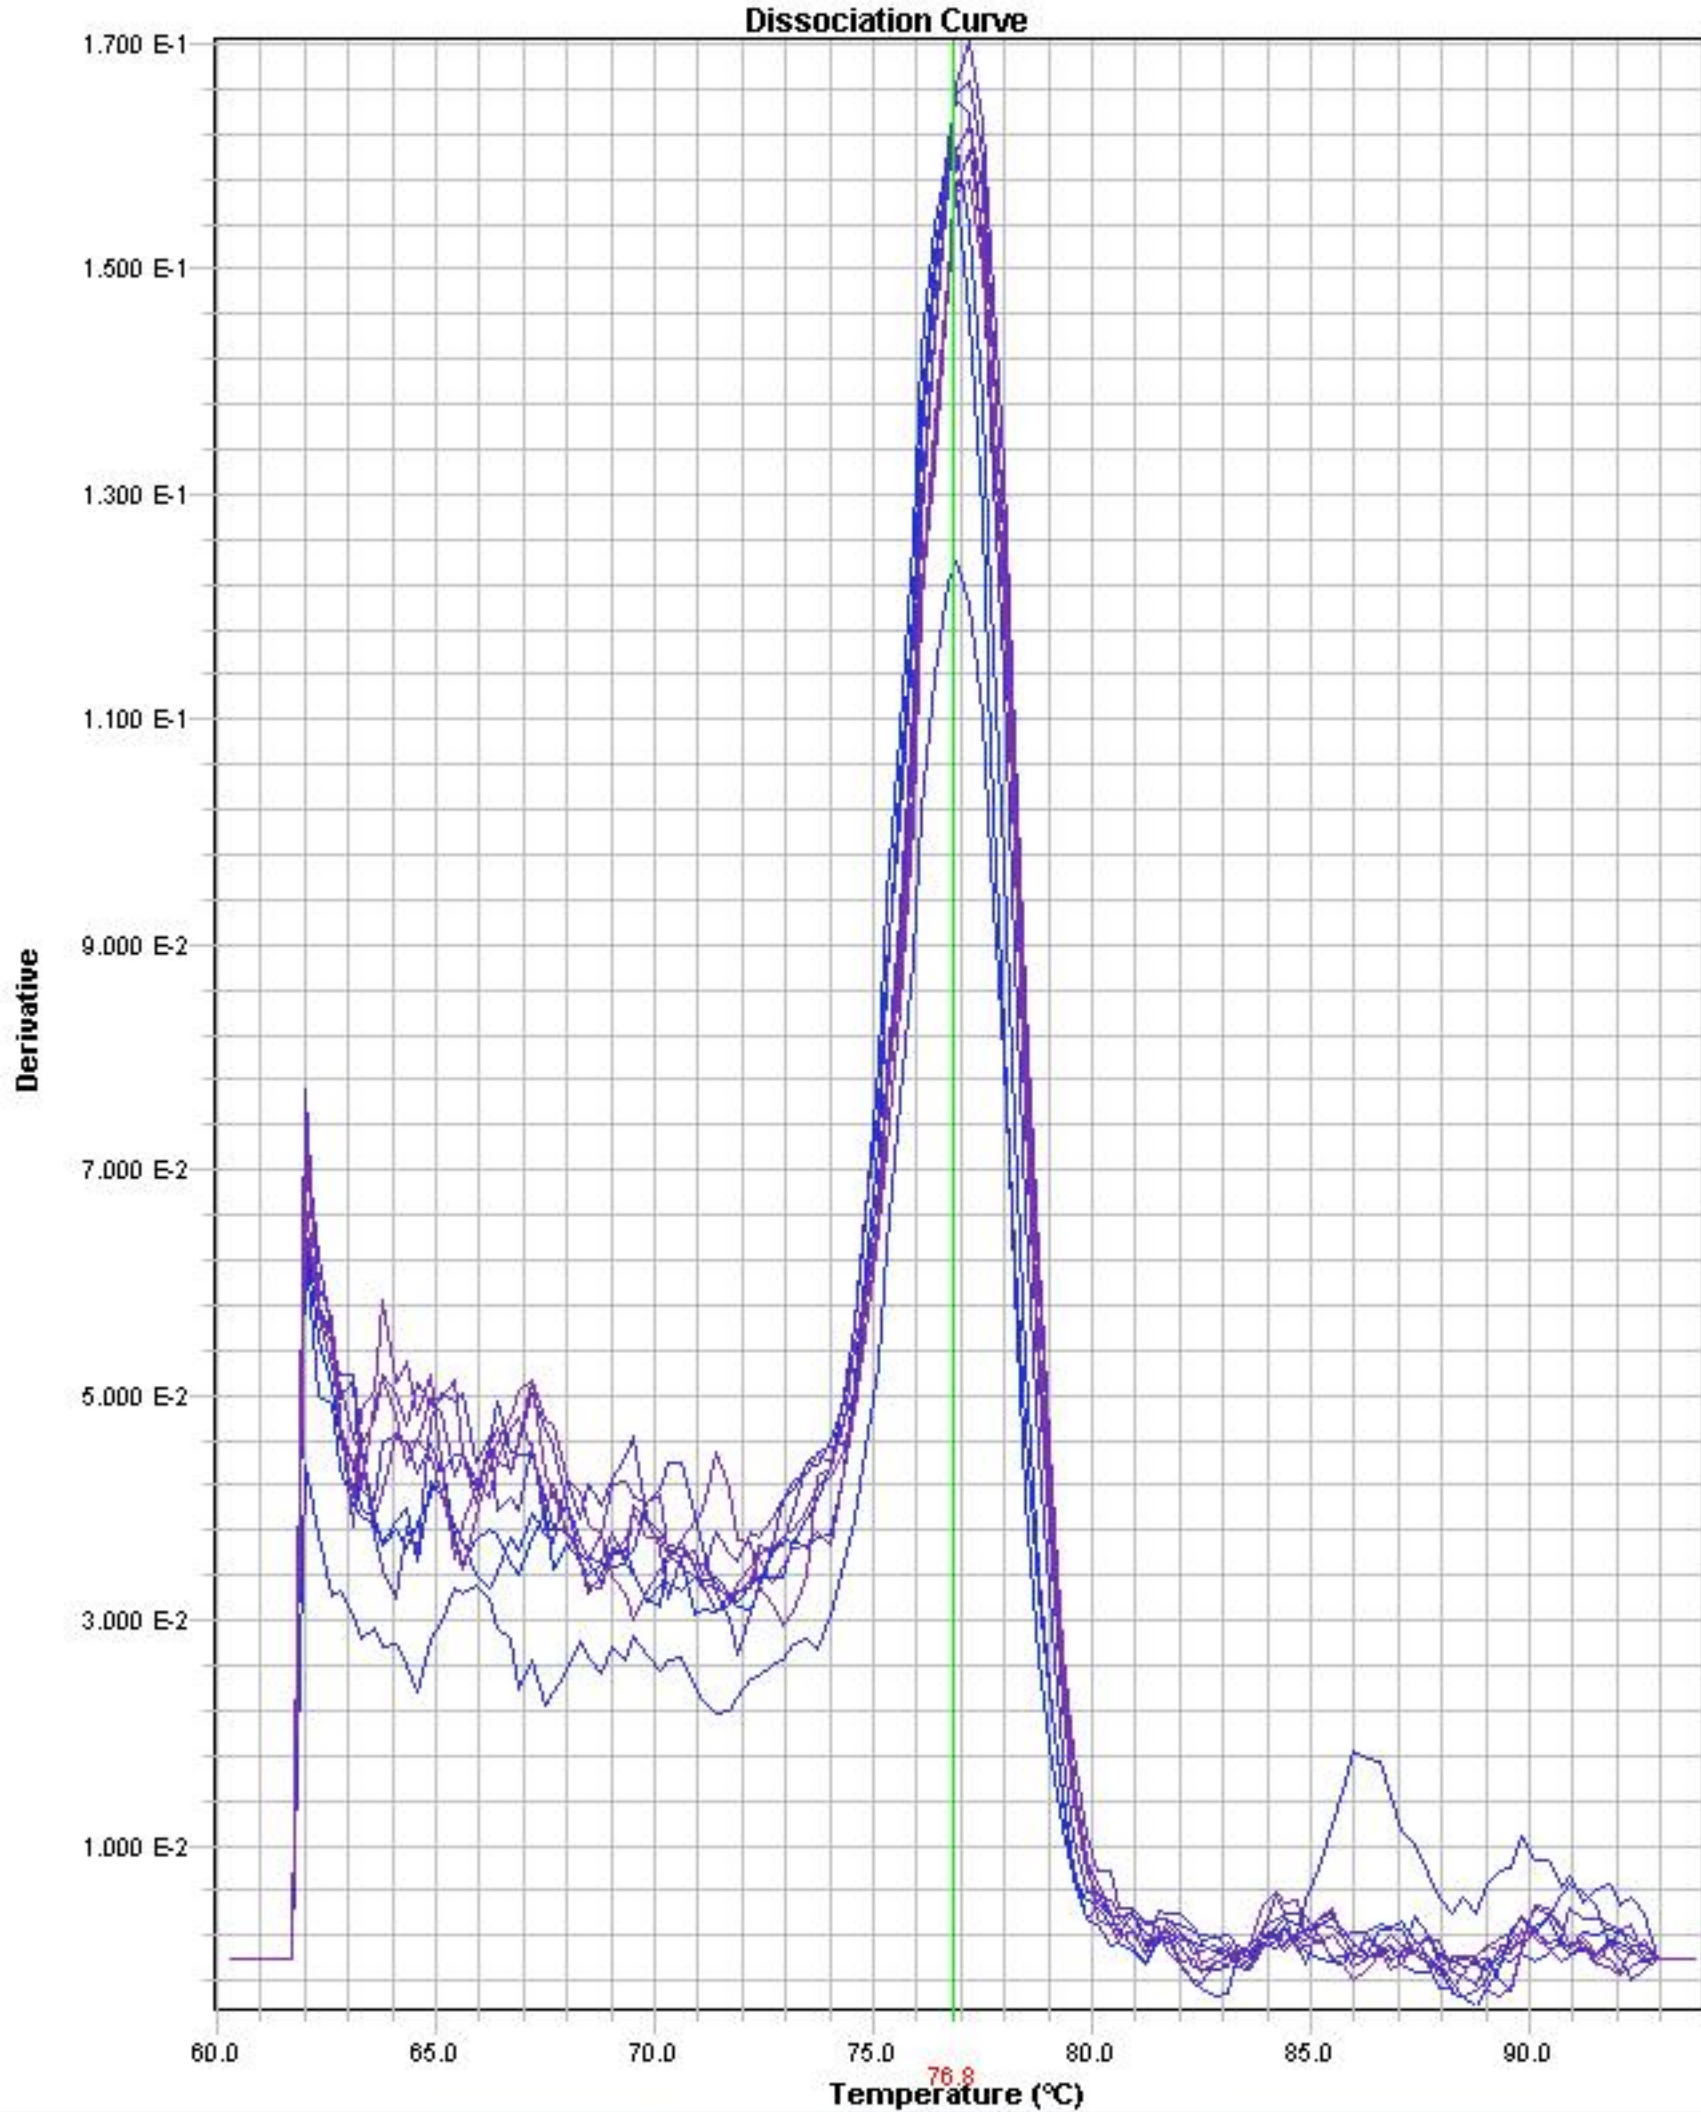

Detector:

Plot:

Step:



Dissociation Curve

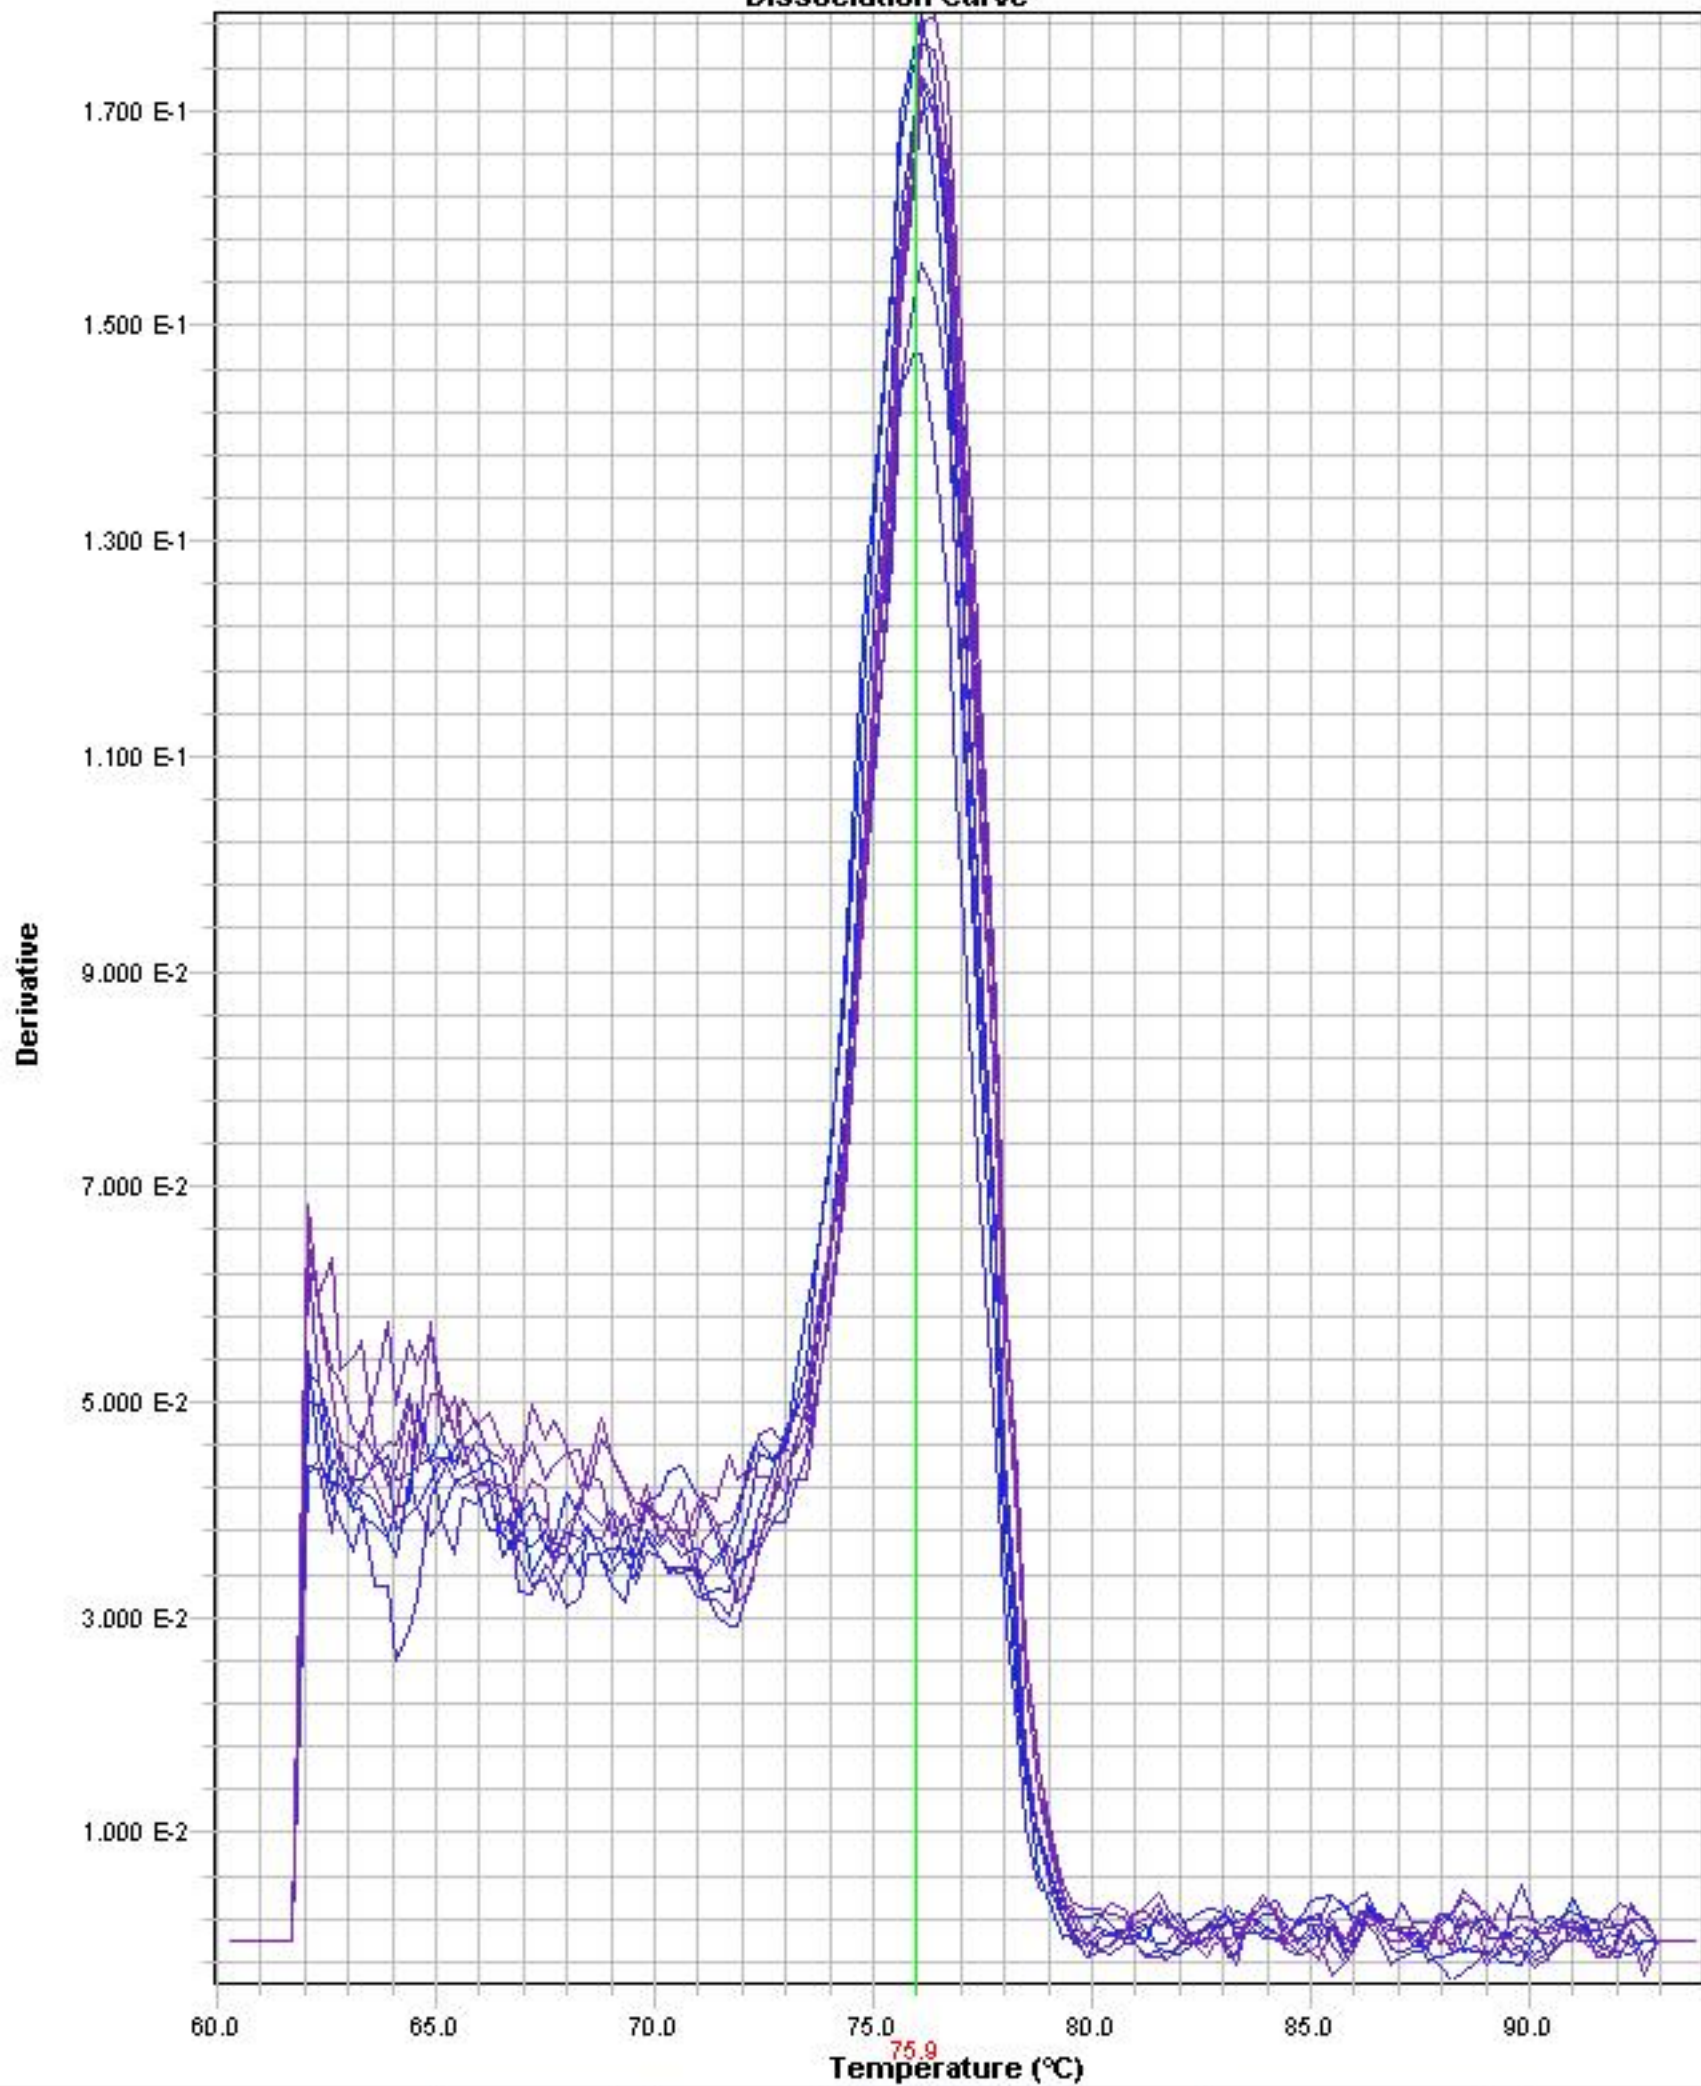

Detector:

Plot:

Step:
